# Supplementary material for: Anion channel SLAH3 is a regulatory target of chitin receptor-associated kinase PBL27 in microbial stomatal closure
Source: eLife journal article supplement (doi:10.7554/elife.44474), 2019-09-16
Supplement: supp [file elife-44474-supp-v1.zip]

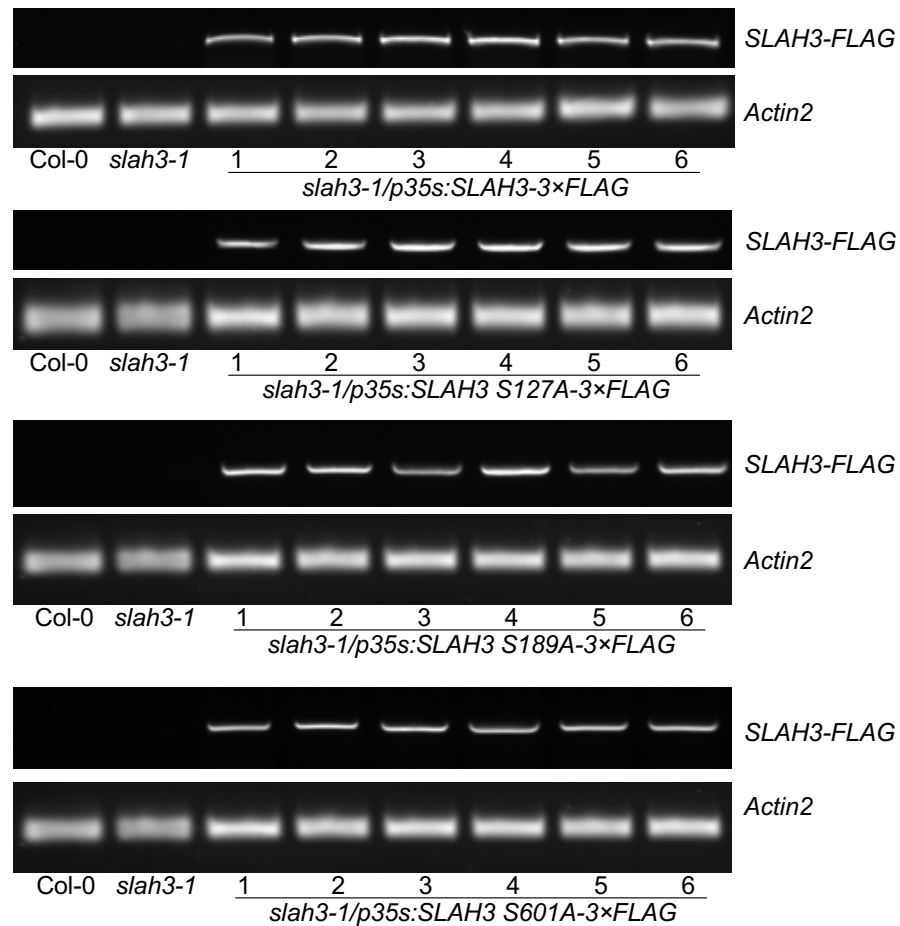

**Figure 5-figure supplement 1. Functional complementation of SLAH3 transgenic lines.** RT-PCR analysis of T1 transgenic *slah3-1/p35S::SLAH3-3xFLAG* lines and respective T1 lines expressing the S127A, S189A and S601A SLAH3 variants. RNA was extracted from six independent transgenic plants used in Figure 4 for stomatal aperture measurements.
