# Supplementary material for: Anion channel SLAH3 is a regulatory target of chitin receptor-associated kinase PBL27 in microbial stomatal closure
Source: eLife journal article supplement (doi:10.7554/elife.44474), 2019-09-16
Supplement: supp [file elife-44474-supp-v1.zip]

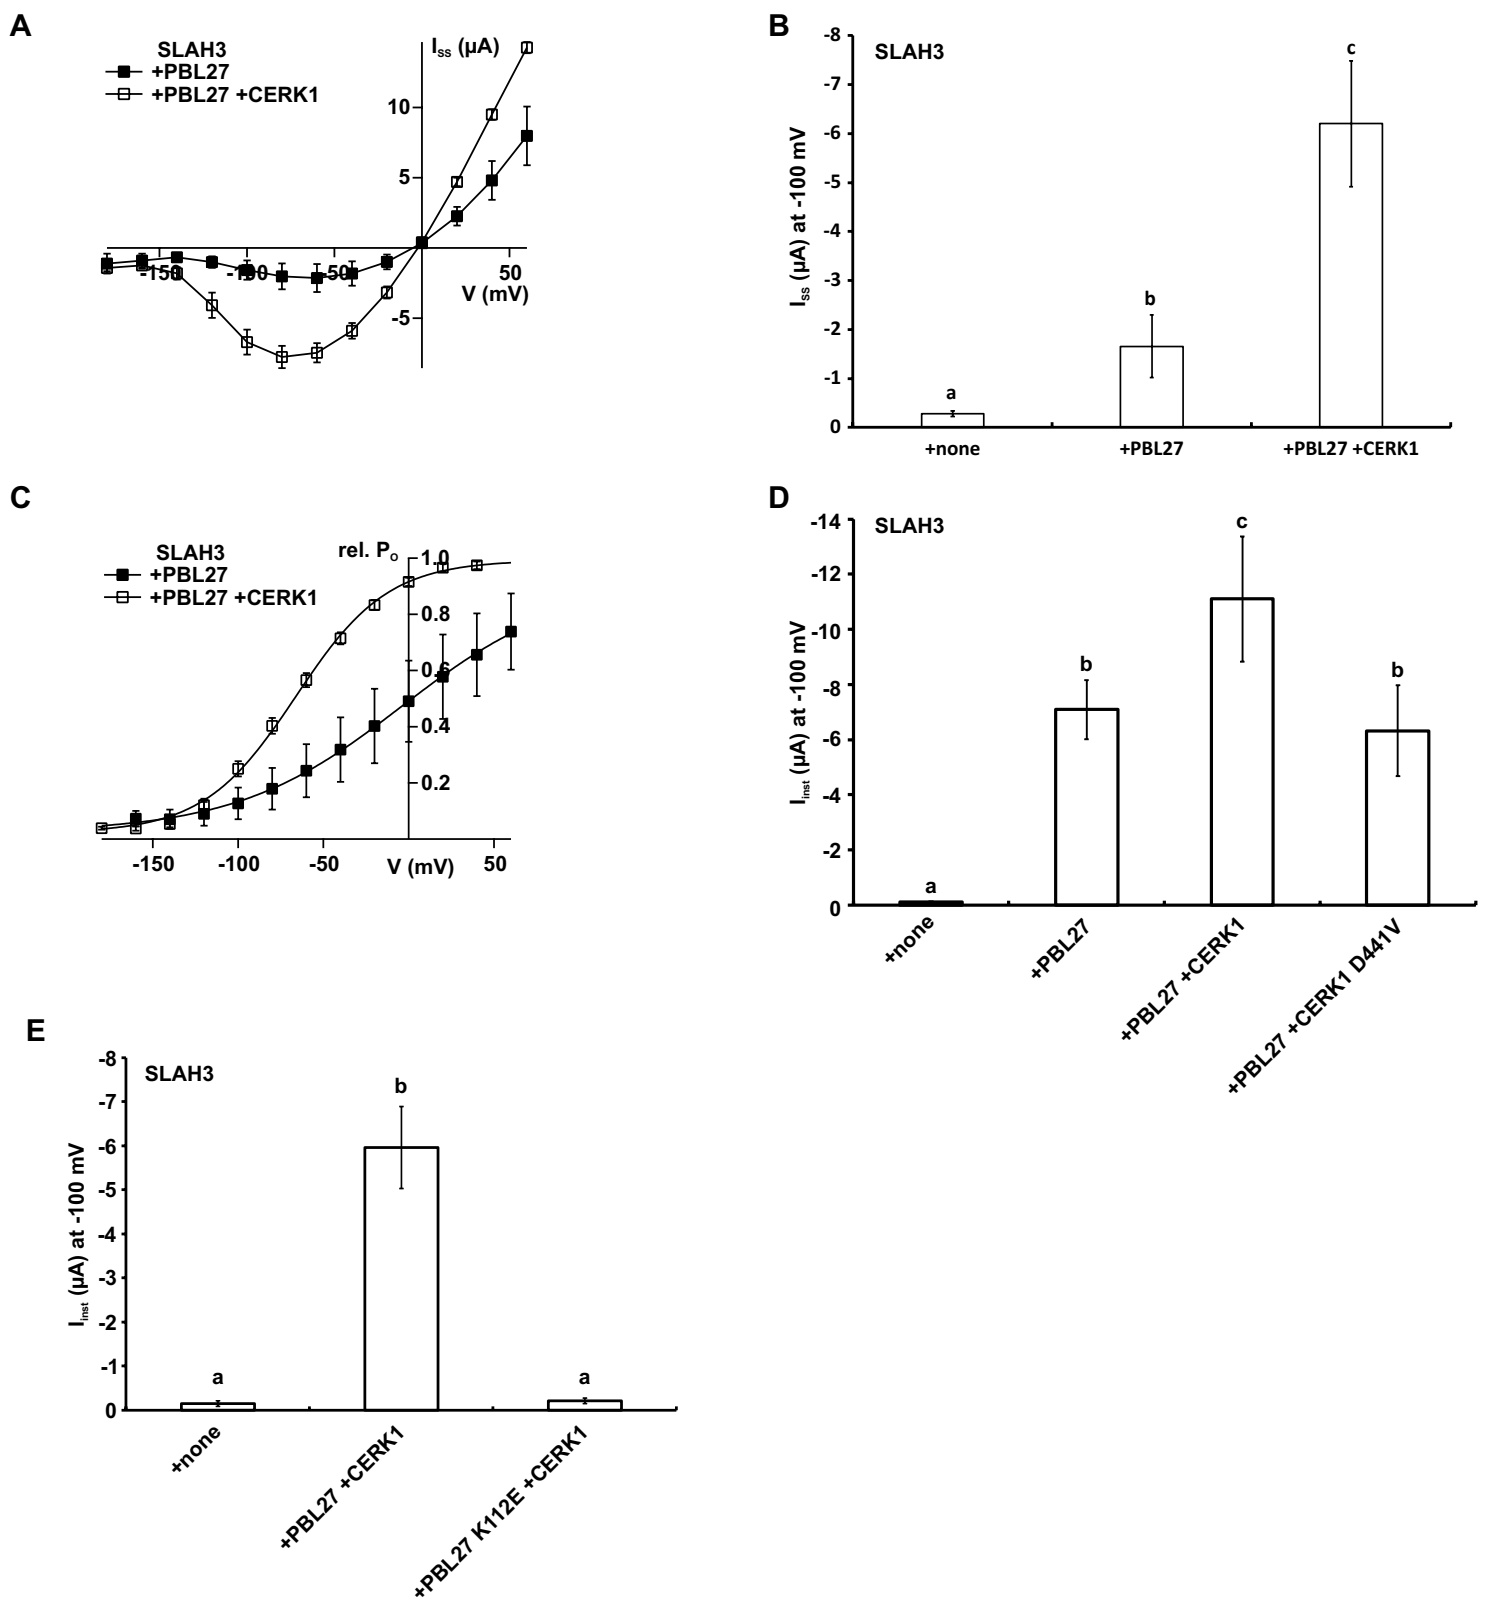

**Figure 3-figure supplement 2. CERK1 enhances PBL27 activation of SLAH3.** (A) Steady-state currents ( $I_{ss}$ ) of oocytes co-injected with SLAH3 and PBL27 in the presence or absence of CERK1. Currents were recorded in 30 mM nitrate-based buffers ( $n \geq 4$  experiments, mean  $\pm$  SD). (B) Steady-state currents of oocytes injected with wild type SLAH3 alone or co-injected with PBL27 in the presence or absence of wild type CERK1. Currents were recorded at -100 mV in 30 mM nitrate-based buffers ( $n = 4$  experiments, mean  $\pm$  SD). (C) Relative voltage-dependent open probabilities (rel.  $P_o$ ) of SLAH3 activated by either PBL27 alone or in combination with CERK1 in 30 mM nitrate. Rel.  $P_o$  was calculated from a -120-mV voltage pulse following the test pulses in the voltage range of +60 to -200 mV in 20-mV decrements. Data points were fitted by a Boltzmann equation (continuous line;  $n \geq 4$  experiments, mean  $\pm$  SD). (D) Instantaneous currents of oocytes injected with wild type SLAH3 alone or co-injected with PBL27 in the presence or absence of wild type CERK1 or the phospho-dead mutant CERK1 D441V. Currents were recorded at -100 mV in 100 mM nitrate containing buffers ( $n = 4$  experiments, mean  $\pm$  SD). (E) Instantaneous currents of oocytes injected with wild type SLAH3 alone or co-transfected with either PBL27 wild type or PBL27 K112E in the presence of CERK1. Currents were recorded at -100 mV in 100 mM nitrate containing buffers ( $n = 4$  experiments, mean  $\pm$  SD). Significant differences (ANOVA with Tukey's HSD test,  $P < 0.01$ ) between bars are denoted with different letters.
