# Supplementary material for: Anion channel SLAH3 is a regulatory target of chitin receptor-associated kinase PBL27 in microbial stomatal closure
Source: eLife journal article supplement (doi:10.7554/elife.44474), 2019-09-16
Supplement: supp [file elife-44474-supp-v1.zip]

Archive with 18 entries (18 files):
- elife_poa_e44474_Figure_2_source_data_4.pptx
- elife_poa_e44474_Figure_5_source_data_1.xlsx
- elife_poa_e44474_Transparent_Reporting_File.docx
- elife_poa_e44474_Figure_5_source_data_2.xlsx
- elife_poa_e44474_Figure_2_figure_supplement_1.pdf
- elife_poa_e44474_Figure_1_figure_supplement_2.pdf
- elife_poa_e44474_Figure_2_source_data_3.pptx
- elife_poa_e44474_Figure_3_figure_supplement_1.pdf
- elife_poa_e44474_Figure_2_source_data_1.pptx
- elife_poa_e44474_Figure_2_source_data_5.pptx
- elife_poa_e44474_Figure_2_source_data_2.pptx
- elife_poa_e44474_Figure_3_figure_supplement_3.pdf
- elife_poa_e44474_Figure_3_source_data_1.xlsx
- elife_poa_e44474_Figure_3_figure_supplement_2.pdf
- elife_poa_e44474_Figure_5_source_data_3.xlsx
- elife_poa_e44474_Figure_4_figure_supplement_1.pdf
- elife_poa_e44474_Figure_1_source_data_1.xlsx
- elife_poa_e44474_Figure_1_figure_supplement_1.pdf
