# Supplementary material for: Anion channel SLAH3 is a regulatory target of chitin receptor-associated kinase PBL27 in microbial stomatal closure
Source: eLife journal article supplement (doi:10.7554/elife.44474), 2019-09-16
Supplement: supp [file elife-44474-supp-v1.zip]

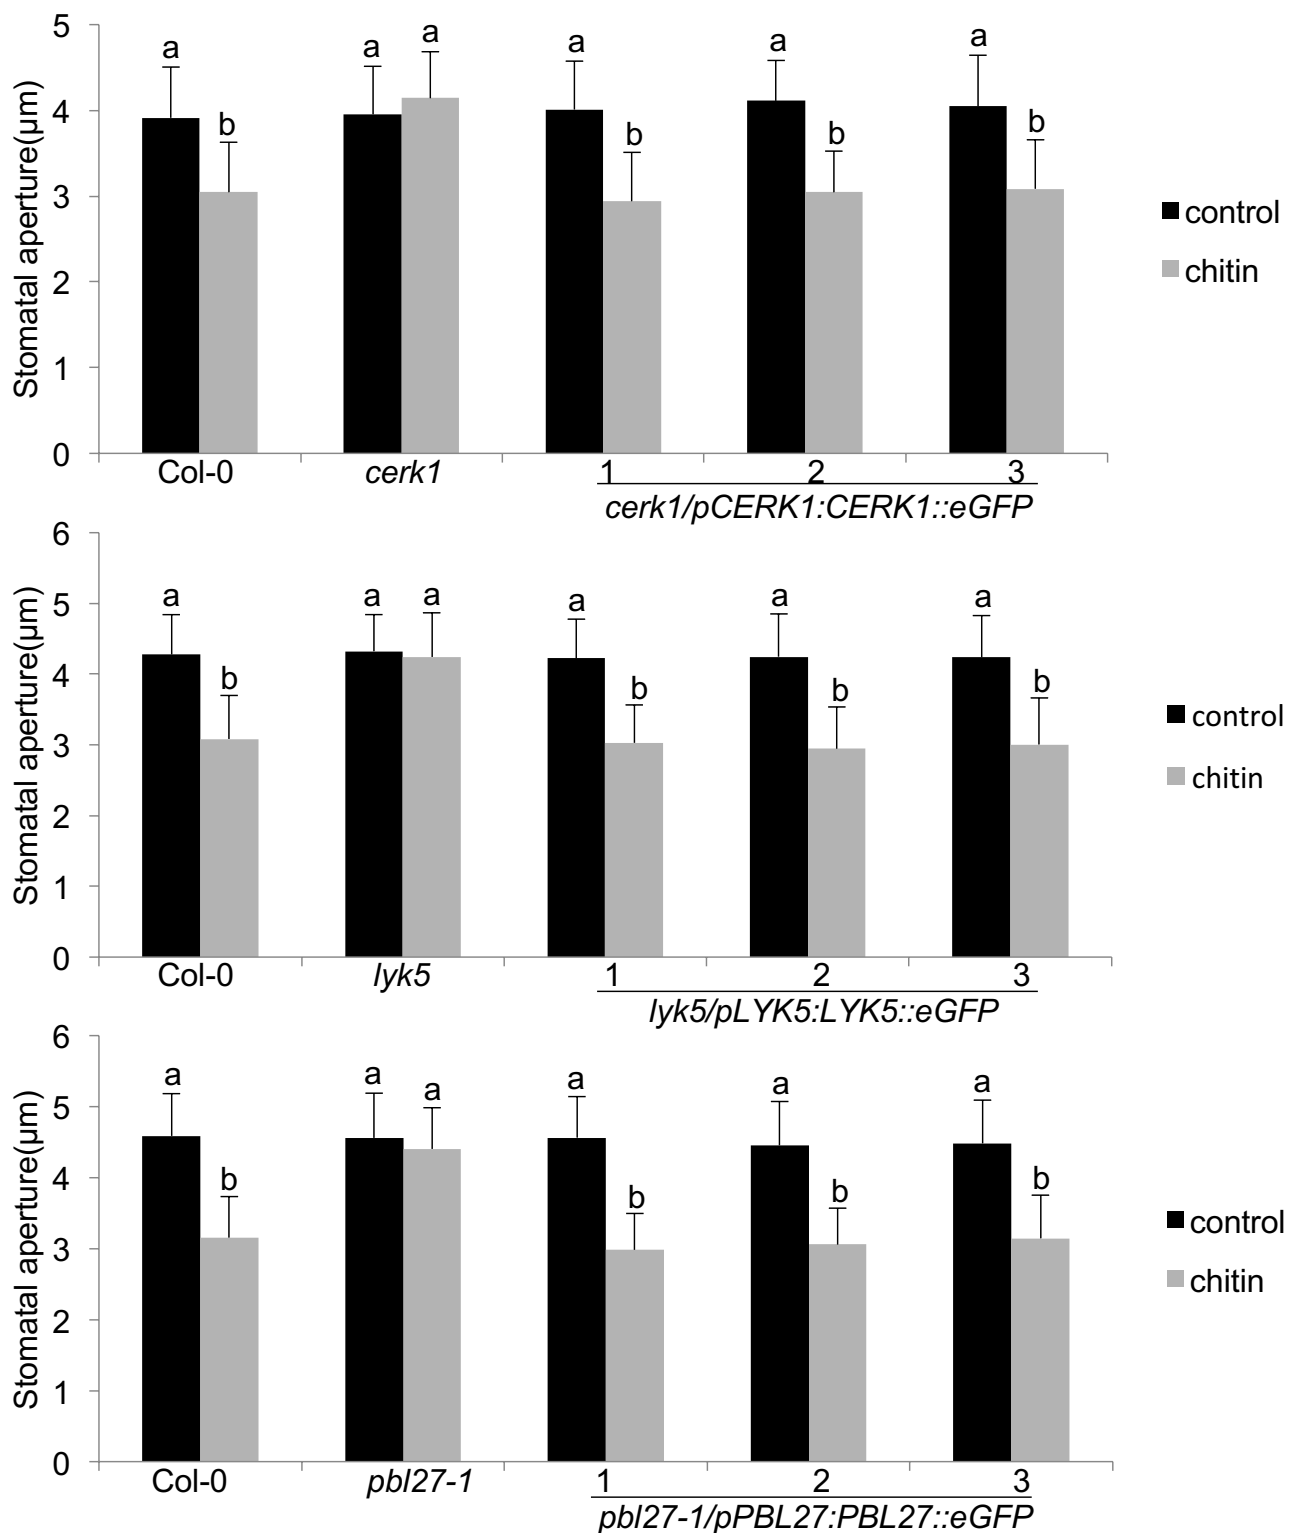

**Figure 1-figure supplement 1. Functional complementation and guard cell expression of the LYK5-CERK1-PBL27 receptor complex.** Stomatal aperture measurements in transgenic *cerk1/pCERK1::CERK1-eGFP*, *lyk5/pLYK5::LYK5-eGFP* and *pbl27-1/pPBL27::PBL27-eGFP*. Mature leaf discs of six independent transgenic T1 lines were soaked in opening buffer (10mM MES, 50mM KCl, pH 6.15) and kept under light ( $100 \mu\text{mol.m}^{-2} \text{s}^{-1}$ ) for 2 hr. Stomatal aperture was measured 2 hr after treatment with 1mg/ml chitin. Values are mean  $\pm$ SD ( $n > 50$ ; two-way ANOVA). Different letters indicate significantly different values at  $p < 0.05$ . These experiments were repeated three times with similar results.
