# Supplementary material for: Anion channel SLAH3 is a regulatory target of chitin receptor-associated kinase PBL27 in microbial stomatal closure
Source: eLife journal article supplement (doi:10.7554/elife.44474), 2019-09-16
Supplement: supp [file elife-44474-supp-v1.zip]

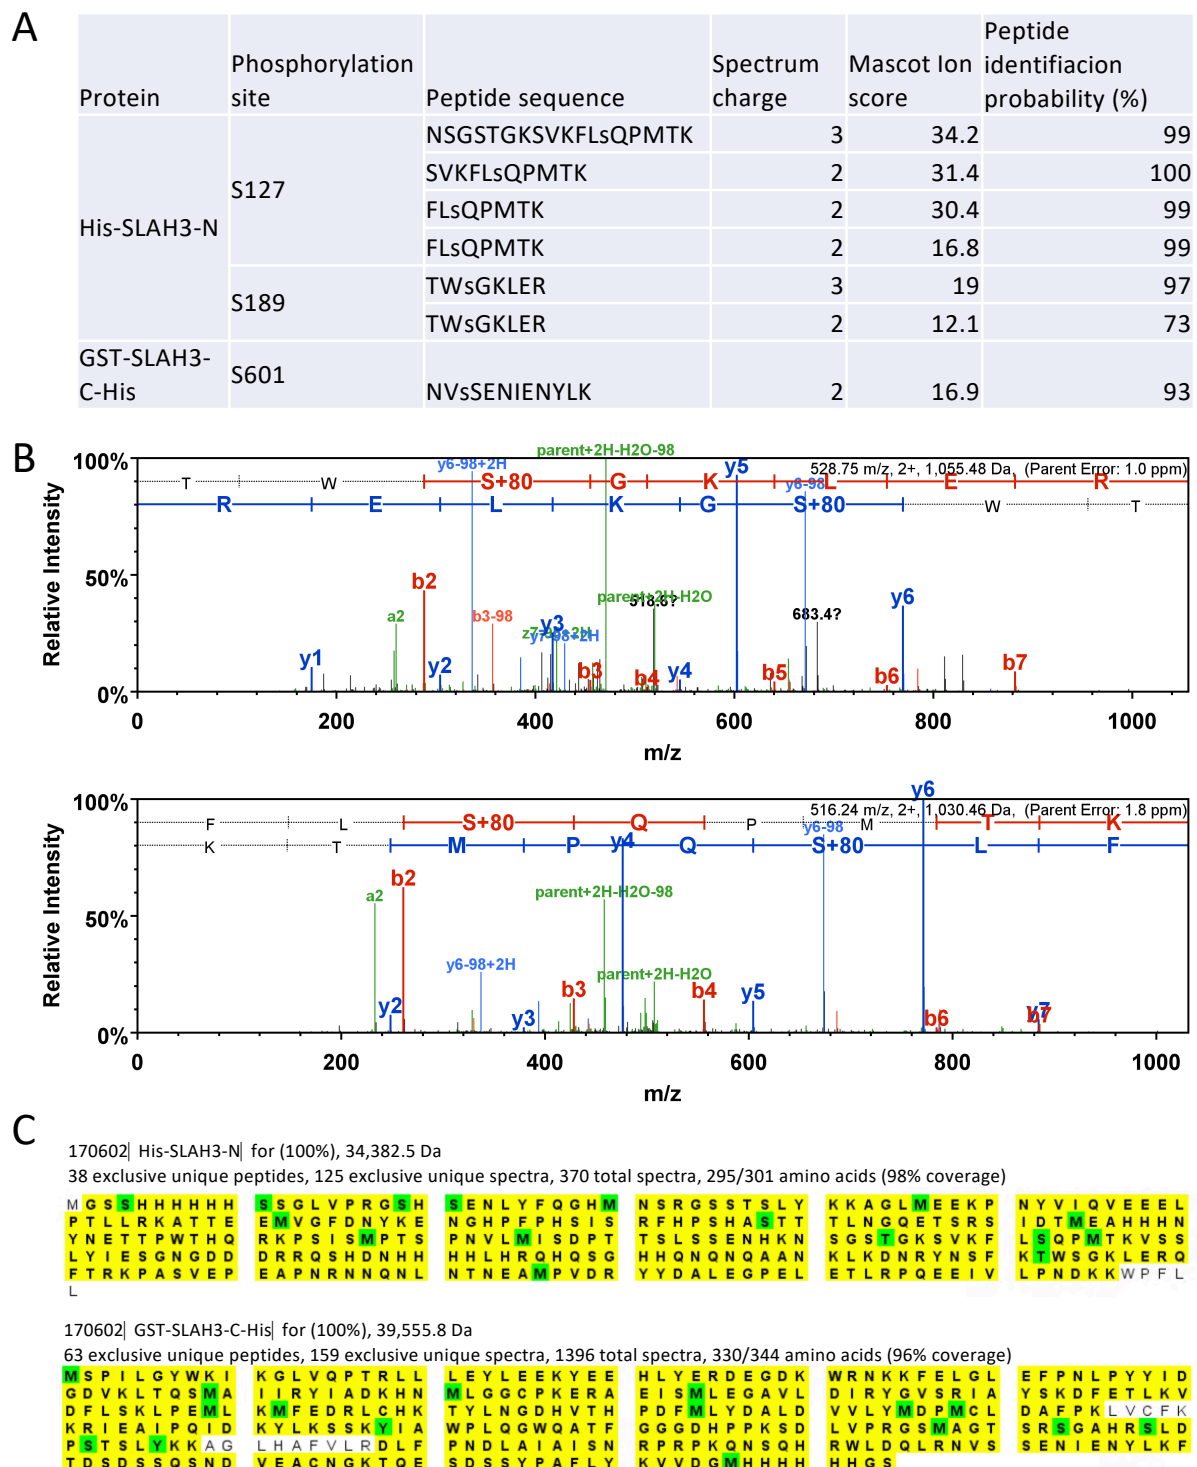

**Figure 2-figure supplement 1. Identification of SLAH3 tryptic phospho-peptides.** (A) Summary of tryptic phospho-peptides by LC-MS/MS analysis of incubated recombinant His-MBP-PBL27 with recombinant His-SLAH3-N or GST-SLAH3-C (GST-SLAH3-C-His) in *in vitro* kinase assays. Phosphorylated residues are denoted as “s”. (B) Representative spectra of phosphorylated S127 and S189 tryptic peptides. (C) Scaffold images for the samples for which the phosphopeptides were identified and at conservative settings (95% protein and peptide identity and minimum 2 peptides per protein). Since the samples contain recombinant protein the peptide coverage is extremely high. (96 and 98%). Peptides identified are marked in yellow and modified residues are shown in green.
