# Supplementary material for: Anion channel SLAH3 is a regulatory target of chitin receptor-associated kinase PBL27 in microbial stomatal closure
Source: eLife journal article supplement (doi:10.7554/elife.44474), 2019-09-16
Supplement: supp [file elife-44474-supp-v1.zip › elife_poa_e44474_Figure_1_figure_supplement_2.pdf]

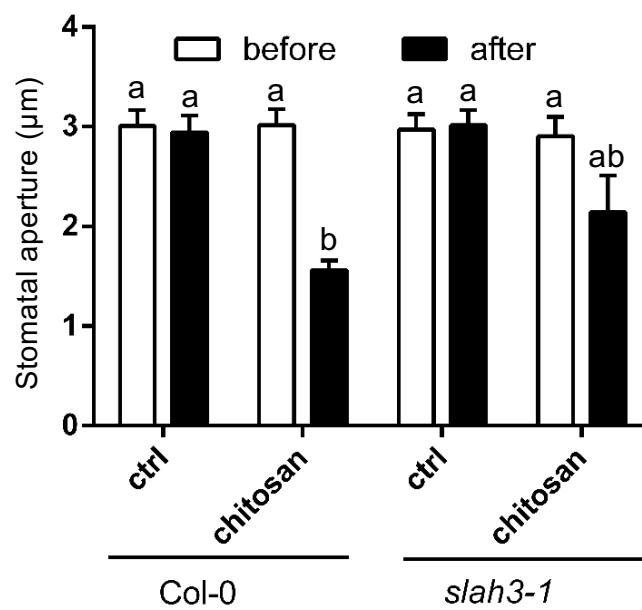

**Figure 1-figure supplement 2. Current ejection of chitosan induces stomatal closure in *Arabidopsis*.** Chitosan was current ejected into the cell wall of guard cells in intact leaves via a microelectrode, by application of 1 nA positive current for 1 min. The tip of electrode was filled with 0.3 mg/ml chitosan or 10 mM MES/BTP (pH6, control), and rest with 300 mM KCl. Data are presented as average  $\pm$  SE. Col-0 control, n = 8 stomata; Col-0 chitosan, n = 8 stomata; *slah3-1* control, n = 3 stomata; *slah3-1* chitosan, n = 8 stomata. The statistical significance indicates with different characters (one-way ANOVA, Tukey's test, P < 0.05).
