# Supplementary material for: Anion channel SLAH3 is a regulatory target of chitin receptor-associated kinase PBL27 in microbial stomatal closure
Source: eLife journal article supplement (doi:10.7554/elife.44474), 2019-09-16
Supplement: supp [file elife-44474-supp-v1.zip › elife_poa_e44474_Figure_1_source_data_1.xlsx]

## Sheet: 1A rep1
	Col-0 control	Col-0 chitin		cerk1 control	cerk1 chitin		lyk2 control	lyk2 chitin		lyk3 control	lyk3 chitin		lyk4 control	lyk4 chitin		lyk5 control	lyk5 chitin
	4.72	2.71		3.88	4.63		4.88	2.81		4.21	3.47		5	3.37		3.97	4.55
	4.97	3.38		4	3.84		4.42	3.87		4.01	2.31		4.43	2.38		4.43	3.86
	4.96	2.29		3.92	4.85		4.09	2.64		4.95	2.66		4.55	3.69		4.46	4.03
	3.89	2.28		3.99	3.5		3.58	3.01		3.61	3.74		3.74	2.7		4.4	4.72
	4.81	2.64		3.57	3.85		4.85	3.01		3.82	3.91		4.62	3.11		4.42	3.7
	4.31	2.74		4.62	3.59		4.49	2.74		3.99	2.33		4.37	2.7		4.85	3.97
	4.65	3.06		4.96	4.24		4.06	3.84		4.46	2.44		4.65	2.6		4.62	4.81
	3.73	3.01		4.35	4.11		4.01	2.7		4.51	2.22		4.2	3.17		4.98	3.84
	4.64	2.62		4.49	3.88		4.09	2.71		5	2.44		4.78	3.16		3.62	4.23
	3.67	3.46		4.38	4.59		3.72	2.29		4.93	3.02		3.71	3.46		4.89	4.66
	4.11	3.29		4.2	4.39		4.72	2.38		4.05	3.1		3.73	2.75		4.47	4.94
	4.25	3.99		4.43	3.71		4.45	2.86		3.98	3.71		4.53	2.8		4.38	3.81
	4.65	2.95		3.83	4.3		4.92	3.64		4.07	3.43		3.91	3.59		4.61	4.67
	3.68	3.7		4.81	4.45		3.79	2.81		3.81	3.13		3.7	3.48		3.48	4.84
	4.7	3.52		4.04	4.87		4.17	2.19		3.92	3.72		4.7	2.12		4.26	4.02
	4.14	3.79		3.7	4.73		4.96	2.43		3.99	3.01		3.94	2.62		4.14	4.21
	4.76	2.55		4.95	4.39		3.8	2.42		3.86	3.09		4.59	3.43		4.07	4.72
	4.74	2.59		3.96	4.64		4.22	3.11		4.24	2.93		4.66	3.56		3.56	4.14
	4.46	2.98		3.59	4.77		3.76	2.06		4.45	3.74		4.02	2.71		4.03	4.33
	4.52	3.29		4.51	3.69		4.64	3.07		4.13	3.12		4.21	2.95		4.95	3.95
	3.75	2.91		4.41	4.76		4.45	2.69		4.75	3.47		3.76	2.29		4.77	3.84
	4.32	2.67		4.17	4.96		3.69	3.59		4.54	2.93		4.88	3.49		3.47	4.78
	4.01	3.05		4.08	3.97		4.12	3.74		4.38	3.08		3.91	2.46		3.79	3.91
	4.43	3.81		4.98	3.7		4.55	2.41		4.17	2.49		3.95	2.68		3.85	3.76
	3.71	3.72		4.91	4.22		4.05	3.17		4.72	3.72		4.14	3.05		4.63	4.5
	3.92	3.61		4.64	4.26		4.12	2.5		4.01	2.52		4.5	2.39		4.34	4.95
	4.17	4.1		4.83	4.55		4.11	3.41		3.89	3.89		3.93	2.4		4.18	3.66
	4.45	2.41		4.61	4.33		4.62	2.98		4.43	3.03		4.14	2.75		3.41	4.85
	3.82	3.08		4.92	3.76		4.93	2.87		4.32	3.27		4.22	2.95		3.76	4.9
	3.89	2.35		3.55	4.04		4.47	2.37		4.79	2.39		3.79	2.66		4.71	4
	4.52	4.05		4.86	3.76		3.78	3.49		3.86	2.81		3.89	2.17		4.72	4.82
	3.7	3.44		4.25	4.75		4.5	2.26		4.3	3.7		4.94	3.12		4.57	4.85
	3.66	2.52		4.9	3.68		4.58	2.58		3.96	3.4		4.99	2.27		4.99	3.9
	4.14	2.34		4.88	4.53		4.94	3.74		4.81	3.49		3.72	3.47		3.46	4.37
	4.14	3.14		4.06	4.13		3.5	3.37		4.23	3.41		3.71	3.51		3.44	4.69
	3.71	2.3		4.26	3.93		4.62	2.65		4.06	3.59		4.13	2.79		4.1	4.75
	4.05	3.37		3.55	4.72		4.09	3.2		4.77	3.94		4.1	3.69		4.89	4.39
	4.26	3.76		4.07	3.81		4.53	2.85		4.87	3.38		4.76	2.35		4.86	4.93
	3.75	2.7		4.36	3.92		4.52	2.53		4.85	2.6		4.97	3.31		4.14	3.64
	4.35	3.39		4.94	3.6		4.83	3.66		4.84	3.3		4.32	2.84		3.48	4.77
	4.37	3.34		4.84	3.78		4.22	2.89		4.12	2.74		4.71	2.99		3.94	4.95
	4.9	3.81		4.99	4.86		4.76	2.71		4.96	2.98		3.71	3.85		4.32	4.97
	4.21	3.92		4.5	4.83		3.92	3.33		3.98	2.29		3.75	3.77		3.97	3.78
	4.03	4.04		3.93	3.86		3.73	3.9		4.95	3.33		3.87	3.53		4.96	3.61
	4.9	2.65		4.61	4.8		4.62	2.9		3.66	2.89		4.12	3.32		4.13	4.27
	4.12	2.76		3.84	3.58		4.53	2.51		4.74	3.59		4.4	3.18		4.45	4.81
	3.76	3.27		4.66	3.67		4.59	3.62		3.9	2.87		4.1	3.87		4.32	4.66
	4.83	3.51		3.61	4.03		3.6	3.73		4.45	3.83		3.87	3.56		4.67	4.98
	4.46	2.75		4.19	4.99		4.69	3.53		4.94	3.4		4.35	2.92		4.58	4.2
	4.42	2.84		4.01	4.44		3.93	3.2		4.31	4		4.18	2.33		4.87	4.53
	4.85	3.35		4.64	3.69		3.62	2.42		4.78	3.78		4.9	2.29		3.46	4.53
	4.98	3.73		4.62	3.99		3.85	3.34		4.33	3.95		4.16	3.08		3.74	4.02
	3.92	4.03		4.2	4.13		4.67	3.47		4.99	3.01		3.92	3.01		3.83	3.92
	4.08	2.74		3.66	3.55		3.58	3.14		4.52	2.63		4.05	2.13		3.59	3.68
	4.9	3.66		4.73	4.42		3.85	3.03		3.74	3.52		4.84	3.5		3.9	4.45
	4.78	4.09		4.94	4.54		4.16	2.39		4.58	2.74		3.73	3.4		4.01	3.99
	3.98	3.66		3.96	4.53		4.13	2.52		4.46	2.27		4.09	3.49		3.41	4.99
	4.35	3.81		4.98	4.75		3.52	2.66		4.1	3.1		4.89	3.93		3.57	3.67
	4.76	3.33		3.53	3.47		3.88	3.76		4.23	2.24		4.21	2.26		3.81	4.79
	3.92	2.8		4.76	4.83		4.41	2.99		3.93	3.35		4.41	3.03		3.96	4.81
	3.95	3.83		4.8	3.4		4.35	2.84		4.58	2.44		4.83	3.76		4.99	4.17
	4.3	2.26		4.59	4.59		4.65	2.62		4.27	3.07		3.95	3.62		4.41	4.67
	4.85	3.58		4.56	4.18		3.93	3.09		4.2	2.81		4.19	2.73		3.89	3.99
	4.8	2.83		4.73	4.13		4.5	2.55		4.72	3.75		4.68	3.05		3.48	4.91
	4	2.56		4.45	4.61		3.79	3.72		4.2	2.89		4.1	3.88		4.68	4.14
	4.14	2.43		4.62	4.84		3.93	2.33		4.52	3		4.56	2.25		3.9	3.76
	4.58	2.36		4.85	4.36		3.51	3.81		3.99	2.31		4.44	3.85		4.05	4.45
	3.94	2.44		4.12	4.44		3.77	2.74		4.57	2.69		4.39	2.92		3.78	4.77
	4.59	3.47		3.64	4.24		3.99	3.34		4.23	2.85		4.91	3.07		4.9	4.81
	4.25	3.22		4.51	4.51		3.56	2.28		4.97	3.34		4.51	2.11		4.44	3.98
	3.61	3.54		4.69	3.57		3.65	3.23		4.87	3.61					4.69	3.69
	4.1	3.29		4.33			4.28	2.95		4.3	3.48					4.72	4.39
	3.89	2.71		3.65			4.2	2.47		4.36							3.82
	4.38	2.74		3.53			4.55	2.97									4.67
	4.34			4.25				2.68
	4.72							3.85
								3.69
								3.03
	4.29039	3.14743		4.34573	4.22549		4.21	2.98564		4.35603	3.12056		4.28014	3.02386		4.21625	4.35257
	0.399778	0.546175		0.453295	0.451248		0.423081	0.496145		0.382821	0.506487		0.399879	0.525907		0.492257	0.445812
	4.29039	3.14743		4.34573	4.22549		4.21	2.98564		4.35603	3.12056		4.28014	3.02386		4.21625	4.35257
	0.399778	0.546175		0.453295	0.451248		0.423081	0.496145		0.382821	0.506487		0.399879	0.525907		0.492257	0.445812
control	4.29039	4.34573	4.21	4.35603	4.28014	4.21625
chitin	3.14743	4.22549	2.98564	3.12056	3.02386	4.35257
	0.399778	0.453295	0.423081	0.382821	0.399879	0.492257
	0.546175	0.451248	0.496145	0.506487	0.525907	0.445812

## Sheet: 1A rep2
	Col-0 control	Col-0 chitin		cerk1 control	cerk1 chitin		lyk2 control	lyk2 chitin		lyk3 control	lyk3 chitin		lyk4 control	lyk4 chitin		lyk5 control	lyk5 chitin
	3.99	2.63		4.75	3.36		4.75	2.56		3.43	3.87		3.48	3.56		4.41	4.98
	4.22	2.53		3.71	4.94		3.67	2.13		4.26	3.06		3.94	2.91		3.87	3.63
	3.42	3.14		3.05	4.44		3.7	2.64		4.91	2.85		4.13	3.35		3.83	3.46
	3.08	4		3.4	3.51		4.57	3.64		3.53	2.96		4.17	2.33		4.63	4.03
	3.68	3.47		4.03	4.26		4.12	3.44		4.94	2.77		4.03	3.34		4.57	3.65
	3.88	3.83		3.41	4.85		3.94	3.62		3.35	3.52		4.41	3.41		4.96	3.59
	4.83	3.48		4.78	3.94		4.87	3.6		3.48	2.33		4.6	3.19		3.83	4.34
	4.6	3.44		3.77	3.24		4.78	2.37		3.12	2.67		3.64	3.77		4.28	3.24
	3.7	2.46		3.25	3.96		3.28	2.09		3.98	3.37		3.96	3.95		4.74	3.58
	3.02	3.04		3.53	5		4.4	2.22		4.14	3.14		4.08	2.65		3.54	4.57
	3.09	3.36		4.17	4.11		3.45	2.22		4.47	3.33		4.1	3.54		4.4	3.2
	3.13	2.93		3.32	4.01		4.64	3.23		3.73	3.09		4.35	3.45		3.31	3.25
	4.4	3.92		3.7	3.32		4.49	3.43		4.11	2.5		4.34	2.79		3.48	3.85
	4.2	2.51		3.42	4.46		4.28	2.59		4.83	2.99		3.8	3.87		4.93	3.45
	4.97	2.34		3.44	4.84		3.43	3.59		3.37	3.91		3.74	3.21		3.28	4.49
	4.29	3.72		3.12	3.41		3.8	2.25		3.41	2.52		4.27	2.5		4.01	4.74
	3.33	2.63		3.11	3.67		3.06	3.6		4.43	2.95		3.61	3.42		4.46	4.5
	4.47	4.1		3.6	3.21		3.18	3.31		4.88	3.63		4.67	3.99		3.57	3.36
	3.11	3.86		4.53	3.52		4.57	2.74		4.43	3.51		3.91	2.46		3.3	4.53
	3.17	2.49		4.31	4.75		3.29	3.72		4.59	2.64		3.27	2.11		4.26	4.1
	4.51	2.49		3.25	3.27		4.22	3.6		4.12	3.3		4.47	3.15		3.01	4.91
	4.93	3.29		4.16	4.86		3.28	3.1		3.33	3.98		3.33	2.98		3.08	3.94
	3.62	2.47		3.62	4.8		3.03	3.31		4.83	3.95		3.19	3.97		4.74	3.69
	3.7	3.15		4.32	3.16		4.17	3.07		4.7	3.12		3.88	2.22		3.52	4.99
	3.32	2.68		3.6	3.42		3.98	3.44		4.69	3.99		4.44	2.62		3.94	4.25
	3.88	4.05		4.22	3.45		4.25	3.48		3.23	4		3.36	4		4.86	4.75
	3.89	2.46		4.28	4.75		4.64	3.77		3.91	2.78		3.71	3.21		3.32	4.99
	3.38	3.3		4.21	3.81		3.58	3.43		3.89	2.41		4.64	2.94		3.31	3.41
	4.35	3.4		3.64	4.33		4.27	3.19		4.41	3.07		4.56	2.17		3.49	3.77
	4.86	3.21		3.34	3.35		4.07	2.47		4.75	2.99		4.63	3.85		4.06	3.92
	3.51	3.09		4.24	4.66		4.22	2.35		3.21	2.58		3.6	3.94		4.65	3.62
	4.94	2.61		4.41	4.36		4.03	3.21		3.97	2.38		3.48	2.54		4.49	4
	4.76	2.29		3.3	4.41		4.83	3.7		4.91	2.65		3.35	3.53		3.64	3.96
	3.11	4.09		3.77	3.59		4.71	2.83		4.99	3.58		4.89	2.33		3.12	3.74
	4.29	3.28		3.82	5		3.17	3.45		3.83	2.23		4.97	2.17		4.15	3.25
	3.77	3.79		4	3.44		3.96	2.03		4.01	3.4		4.71	3.44		4.67	3.32
	4.66	3.74		3.4	3.82		4.96	2.97		4.26	3.95		4.37	3.11		3.1	3.66
	3.74	2.22		4.84	3.07		3.23	2.58		3.05	3.03		3.63	2.81		3.46	3.31
	3.97	3.81		4.61	3.79		3.14	2.47		4.5	2.87		3.46	3.01		3.42	3.48
	4.63	2.57		3.64	4.95		3.11	2.86		4.37	3.88		3.72	2.74		3.84	4.84
	3.65	3.74		4.27	3.34		4.97	2.07		3.56	3.28		3.81	2.24		4	4.74
	3.31	3.27		3.91	3.48		4.56	2.92		3.84	2.45		4.12	2.1		3.98	3.2
	3.44	3.02		3	3.49		4.74	2.15		4.64	3.1		3.96	2.95		4.77	3.02
	3.79	2.59		4.96	4.73		4.14	3.72		4.52	2.98		4.15	2.49		3.54	4.08
	4.26	3.14		3.68	3.42		4.72	3.29		3.69	3.16		3.11	3.89		3.52	4.35
	3.82	3.21		3.06	3.94		3.81	3.1		4.43	3.43		4.1	2.45		4.04	3.91
	3.43	2.73		4.88	3.91		3.05	2.73		4.83	2.64		4.32	2.12		4.2	3.55
	4.24	3.03		3.2	4.73		4.02	2.84		3.9	3.92		4.73	3.17		4.1	3.57
	4.81	3.3		3.5	4.47		4.93	2.03		4.79	3.78		4.64	3.88		3.43	3.05
	4.65	3.14		3.38	4.54		4.25	2.39		3.47	2.59		3.87	3.28		3.81	4.25
	4.84	3.21		4.07	3.17		4.5	2.34		3.83	3.06		4.43	3.92		4.3	4.98
	3.27	3.23		4.25	4.89		4.09	3.46		3.81	3.39		4.59	3.65		4.56	3.23
	4.33	2.98		4.28	3.23		3.44	3.56		3.76	2.9		4.38	2.4		4.68	4.23
	4.64	2.36		3.93	3.79		4.84	2.99		3.48	3.38		4.58	2.65		4.08	4.04
	4.64	3.39		3.46	3.69		3.51	2.48		4.9	3.23		4.1	3.09		4.81	4.28
	3.8	3.27		4.03	4.35		3.99	2.49		4.02	3.44		4.14	3.15		4	4.04
	4.29	2.56		3.39	3.14		4.97	2		3.48	2.69		4.24	2.98		4.59	4.89
	3.19	2.26		3.27	4.22		4.08	3.4		4.88	2.84		3.77	3.72		4.67	4.86
	3.79	3.93		3.69	3.75		3.81	2.92		4.91	3.49		4.65	2.97		3.97	4.46
	3.17	3.3		4.49	3.81		4.49	2.79		4.26	3.65		3.31	3.61		4.31	4.92
	4.16	2.62		4.07	3.22		3.74	2.98		4.43	3.63		3.48	2.85		4.13	3.67
	3.68	3.14		4.69	3.92		4.96	3.25		3.62	3.32		3.2	2.35		3.03	3.71
	4.88	2.63		4.92	4.36		3.72	3.43		3.25	3.98		4.01	2.39		3.62	4
	3	2.5		3.73	4.25		3.01	3.5		3.13	3.81		3.21	2.57		3.34	3.52
	3.57	2.63		3.78	4.37		3.27	2.81		3.18	2.31		4.8	3.39		4.9	4.92
	4.64	3.95		4.22	3.26		4.95	3.56		4.21	2.72		3.83	3.28		4.17	3.67
	3.94	3.64		3.85	4.27		3.49	3.37		4.03	2.96		3.41	3.13		4.33	3.5
	4.78	2.23		4.34	4.17		4.26	3.56		3			3.56	2.61		3.99	4.74
	4.88	2.81			3.27		3.64	3.58		3.91			3.14	2.89		3.44	3.72
	4.78	2.86			3.93			2.82					3.27	3.15		3.97	3.13
		4.02			3.61			3.7						3.74		4.08
		3.24														3.75
	4.001	3.10833		3.87309	3.96915		4.04449	2.99338		4.05957	3.16239		3.99714	3.06465		3.995	3.97957
	0.610574	0.542319		0.524029	0.587279		0.605394	0.53849		0.586403	0.499294		0.502842	0.56595		0.540696	0.586867
control	4.001	3.87309	4.04449	4.05957	3.99714	3.995
chitin	3.10833	3.96915	2.99338	3.16239	3.06465	3.97957
	0.610574	0.524029	0.605394	0.586403	0.502842	0.540696
	0.542319	0.587279	0.53849	0.499294	0.56595	0.586867

## Sheet: 1A rep3
	Col-0 control	Col-0 chitin		cerk1 control	cerk1 chitin		lyk2 control	lyk2 chitin		lyk3 control	lyk3 chitin		lyk4 control	lyk4 chitin		lyk5 control	lyk5 chitin
	5.19	2.28		3.41	4.89		4.77	3.18		4.26	3.78		5.01	4.01		3.41	5.05
	4.62	3.12		3.64	3.85		3.61	2.46		3.97	3.02		4.8	4.19		4.15	5.1
	4.68	2.7		5.25	5.11		4.04	3.78		4.77	2.51		3.69	4.16		3.58	4.11
	3.49	3.3		5.36	3.73		4.89	2.66		4.51	2.83		3.45	2.7		4.02	3.76
	4.75	3.27		5.3	5.13		3.94	4.02		4.79	2.75		4.42	2.24		4.31	3.4
	5.31	4.2		3.46	3.69		3.69	3.75		4.72	2.7		4.66	2.82		4.72	4.01
	4.53	2.49		4.79	4.13		3.84	2.93		5.36	2.66		3.58	3.2		4.86	3.51
	3.59	2.84		4.43	3.71		5.4	3.23		4.93	2.83		4.94	2.81		4.76	3.89
	3.51	4.18		5.13	5.19		4.66	3.98		5.33	3.15		4.27	2.8		5.1	3.43
	3.53	3.72		4.37	4.65		5.32	3.24		3.97	2.34		4.15	3.62		4.74	4.21
	4.78	2.83		4.96	3.52		4.09	2.6		5.2	2.57		3.44	2.45		3.52	4.17
	4.29	2.62		3.46	3.94		3.53	2.35		3.54	3.36		5.37	3.06		4.55	4.55
	5.06	3.04		3.96	4.79		4.1	3.76		3.83	3.63		5.37	3.54		4.57	4.88
	4.86	3.89		4.77	4.14		4.28	3.47		4.86	2.35		4.81	3.39		5.32	3.68
	3.41	3.88		4.56	4.14		4.85	3.96		4.63	3.08		4.54	3.97		5.04	3.76
	4.01	2.96		5.02	5.34		3.77	4.08		3.84	3.48		3.8	3.99		3.58	5.16
	5.11	2.63		5.26	3.76		4.06	2.62		4.23	2.88		3.89	3.04		3.58	4.53
	3.71	3.49		5.29	5.35		4.47	3		5.37	3.7		3.52	3.63		3.5	4.29
	5.36	3.22		3.89	4.48		4.51	2.96		4.77	3.25		3.88	3.44		4.87	4.96
	4.72	4.14		3.74	4.39		3.81	3.97		4.63	3.38		4.66	2.8		5.01	3.9
	5.3	4.15		4.5	4.3		4.61	4.11		5.24	3.33		4.46	3.53		4.65	5.35
	4.03	2.55		3.72	4.43		3.81	2.75		4.19	4.19		4.17	2.35		3.6	3.77
	4.19	4.06		5.13	4.85		4.17	2.21		3.71	3.02		4.45	3.83		4.51	4.28
	3.44	2.53		3.84	3.7		4.04	3.48		4.43	3.31		4.22	3.44		3.64	5.28
	4.25	4.14		3.45	5.11		5.2	2.28		4.79	3.27		4.5	2.23		5.1	4.58
	5.23	2.62		3.78	5.3		3.75	3.21		3.97	2.28		4.07	3.33		3.97	3.5
	5.3	2.55		4.15	3.44		3.47	3.79		3.94	2.95		4.98	3.39		4.06	3.46
	3.89	3.23		4.1	4.47		4.42	2.26		4.95	3.13		4.95	3.64		3.49	4.91
	4.05	3.51		5.15	3.91		3.57	3.47		3.57	3.94		4.83	2.35		4.77	4.18
	3.56	2.54		3.44	3.45		4.9	4.13		4.36	3.04		3.54	3.29		3.86	4.19
	4.06	3.03		4.06	4.56		4.44	3.92		5.01	4.14		4.4	2.92		5.18	4.46
	4.43	2.36		3.91	4.07		4.57	2.4		4.9	2.39		3.91	3.84		5.11	5.21
	4.52	2.2		5.18	3.69		4.24	2.79		4.87	3.66		4.58	2.76		5.16	5.09
	5.1	3.97		4.88	4.53		5.27	3.31		5.21	3.01		4.27	3.35		4.84	4.28
	5.09	3.75		4.48	5.08		5.38	3.46		5.05	2.33		4.79	2.67		5.33	4.7
	4.45	2.52		4.61	4.04		4.2	2.87		5.02	2.24		4.01	3.48		5.06	3.45
	3.56	3.44		5.32	4.38		4.7	3.28		4.03	2.31		3.89	2.81		4.78	4.13
	4.81	3.94		5.08	3.79		5.34	3.69		3.94	2.74		3.86	3.82		4.53	3.84
	4.44	3.98		5.03	4.91		5.16	3.07		5.22	2.89		3.53	2.87		3.98	3.71
	4.93	2.83		3.69	4.78		4.08	3.25		3.55	3.43		4.51	3.33		4.91	4.34
	3.77	3.18		4.92	4.34		3.58	3		4.8	3.3		4.15	3.01		4.5	3.65
	4.58	2.43		3.85	3.52		3.84	2.88		4.82	3.55		5.02	3.51		4.15	3.91
	5.23	2.89		5.22	4.94		4.77	2.66		5.2	4.09		4.02	3.04		4.38	3.78
	4.3	2.37		3.4	4.94		4.25	2.52		3.79	2.65		3.86	2.72		4.26	3.57
	5.1	4.1		5.11	5.36		4.09	2.43		4.02	4.05		3.86	3.89		4.96	5.4
	4.14	3.16		4.05	4.02		4.19	4.09		5.01	3.33		4.12	3.98		4.75	4.61
	4.88	2.35		5.17	4.54		4.24	3.57		4.01	2.91		4.24	3.71		4.33	4
	3.67	2.9		4.71	4.38		3.99	3.72		4.77	3.64		5.24	3.29		3.77	3.54
	4.36	2.93		5.33	3.7		4.11	3.26		4.19	4.14		5.31	3.55		4.18	3.82
	5.11	3.11		4.33	4.96		3.67	3.86		5.27	2.25		3.84	2.7		4.85	4.32
	3.49	4.14		3.76	4.69		4.88	3.48		3.76	2.87		3.97	3.64		5.25	3.71
	3.84	2.73		4.6	4.56		4.2	3.21		3.76	4.17		4.43	3.41		4.12	4.7
	5.36	2.64		4.17	5.12		4.18	2.49		4.4	3.55		4.82	3.2		5.34	5.22
	4.91	3.43		3.69	3.7		5.17	3.79		4.38	3.74		4.91	3.44		3.99	5.18
	3.7	2.48		5.34	5.03		3.93	4.17		4.53	2.28		4.57	2.63		5.05	4.58
	4.09	2.22		5.3	4.22		4.41	2.36		4.61	3.87		3.86	3.65		3.97	3.96
	4.38	4.07		3.99	3.47		3.75	4.18		3.45	2.26		3.6	3.96		4.16	4.87
	3.97	3.25		4.38	3.44		4.17	4.14		4.86	4.09		3.94	2.52		5	5.38
	5	2.53		4.68	4.53		4.89	3.76		5.02	2.41		4.73	2.42		4.54	5.2
	3.45	4		4.37	4.05		3.84	3.72		4.9	3.12		4.5	2.99		4.12	4.52
	3.55	3.46		4.59	5.18		4.89	3.86		3.84	3.53		4.91	3.91		4.4	4.45
	4.66	2.27		3.92	3.97		5.05	4.09		4.1	2.78		3.44	3.24		4.69	4.09
	4.04	3.86		4.4	3.46		4.14	2.21		4.61	2.4		3.97	3.08		4.01	4.73
	4.44	3.05		5.01	4.47		5.08	3.34		4.99	2.85		4.74	3.47		4.52	4.96
	4.69	2.96		4.38	5.32		5.18	3.82		5.12	2.4		4.81	4.14		5.18	4.75
	3.77	2.48		4.6	4.5		4.04	4.16		3.57	3.94		4.23	3.83		3.61	5.31
	5.39	3.28		4.61	4.11		3.88	3.19		4.18	3.87		4.74	3.53		5.39	5.02
	4.97	3.75		5.02	4.44		4.6	3.12		3.68	2.69		3.94	2.68		3.55	3.89
	3.89	2.95		4.95	4.56		4.34	2.95		4.93	3.4		3.81	3.49		4.96	4.94
	4.25	2.79		3.42	3.84		4.31	2.34		3.94	2.84		4.22	3.21		4.97	4.4
	5.05	3.07		5.23	3.45		4.45	3.57		5.21	2.34		4.69	3.69		5.06	4.74
	4.65	3.03		4.14	3.62		3.79	2.69		4.57	2.7		4.96	2.7		3.73	4.95
	4.4	3.78		5.31			4.13	3.01			3.16		5.23			3.53	3.63
	3.65	3.37		3.8			4.18	2.35			2.33					4.73	4.11
	4.08			4.59			3.54	2.78									5.18
	3.98
	4.64
	4.39701	3.15824		4.47853	4.34931		4.32933	3.26		4.49653	3.09932		4.34041	3.26833		4.45568	4.37507
	0.597746	0.603316		0.622894	0.585841		0.524941	0.605223		0.55387	0.582562		0.523279	0.514445		0.577781	0.596191
	4.39701	3.15824		4.47853	4.34931		4.32933	3.26		4.49653	3.09932		4.34041	3.26833		4.45568	4.37507
	0.597746	0.603316		0.622894	0.585841		0.524941	0.605223		0.55387	0.582562		0.523279	0.514445		0.577781	0.596191
control	4.39701	4.47853	4.32933	4.49653	4.34041	4.45568
chitin	3.15824	4.34931	3.26	3.09932	3.26833	4.37507
	0.597746	0.622894	0.524941	0.55387	0.523279	0.577781
	0.603316	0.585841	0.605223	0.582562	0.514445	0.596191

## Sheet: 1B rep1
	col-0 control	col-0 chitin		pbl27-1 control	pbl27-1 chitin
	4.65	2.38		3.78	4.5
	3.7	2.34		4.23	3.98
	4.61	2.92		3.89	4.22
	4.61	4.01		4.68	4.77
	3.84	2.95		3.87	4.98
	4.22	3.12		4.7	4.88
	4.21	2.76		3.69	4.82
	4.76	3.11		4.82	3.76
	4.84	2.58		4.98	4.79
	4.26	3.8		4.37	4.71
	4.8	3.53		3.88	4.81
	4.9	4.01		4.77	3.54
	4.31	2.43		4.81	3.7
	3.9	3.15		4.78	4.4
	4.34	3.35		3.93	3.89
	4.13	3.19		4.68	4.29
	3.86	3.81		4.25	3.52
	3.6	2.81		4.7	3.54
	4.66	2.85		4.19	3.55
	4.83	3.26		3.89	3.87
	4.99	3.47		3.54	3.66
	4.33	2.61		4.24	3.9
	3.98	3.09		4.78	3.88
	4.69	2.92		4.27	3.86
	4.52	3.7		4.42	3.84
	3.87	2.26		4.49	4.68
	4.71	3.31		4.51	4.91
	4.49	2.66		4.44	4.13
	3.89	3.87		4.99	4.35
	4.12	3.87		4.54	3.44
	4.99	3.74		4.48	4.09
	3.7	3.73		4.6	4.72
	4.37	3.17		4.25	4.14
	4.17	3.42		4.9	3.79
	4.64	3.5		4.88	3.91
	4.22	3.72		4.82	4.7
	3.91	3.41		4.79	3.66
	4.16	3.83		4.27	4.89
	4.84	3.38		3.77	3.6
	4.09	3.17		3.93	4.08
	4.64	3.7		4.25	4.99
	4.2	3.37		3.7	4.57
	4.57	3.31		3.57	4.47
	4.6	3.3		4.95	4.54
	4.87	2.45		3.93	4.88
	3.85	3.93		4.15	3.69
	3.68	2.79		3.52	3.9
	3.66	3.1		4.75	3.5
	3.82	2.34		4.29	4.68
	4.31	3.83		3.96	3.82
	3.71	3.37		3.51	3.55
	4.75	2.58		4.41	4.2
	3.93	2.7		4.64	3.46
	4.32	3.16		4.81	3.79
	4.13	2.57		4.06	4.83
	4.53	4.06		3.78	4.95
	4.38	3.97		4.12	4.04
	4.23	3.54		4.19	4.05
	4.48	3.6		4.91	4.83
	3.61	3.05		3.6	3.72
	4.39	2.99		3.78	4.71
	4.95	2.39		3.51	4.82
	4.69	3.39		3.62	3.65
	4.28	3		3.55	4.56
	3.66	2.9		4.47	4.85
	4.18	2.57		3.89	3.98
	4.93	2.39		4.43
	3.63	2.61		4.17
	4	2.74		4.98
	4.73	4.07
	3.69	2.93
		3.62
		3.78
	4.29732	3.19575		4.27971	4.20879
	0.410338	0.509924		0.453739	0.500666
	4.29732	3.19575		4.27971	4.20879
	0.410338	0.509924		0.453739	0.500666
control	4.29732	4.27971
chitin	3.19575	4.20879
	0.410338	0.453739
	0.509924	0.500666

## Sheet: 1B rep2
	col-0 control	col-0 chitin		pbl27-1 control	pbl27-1 chitin
	4.59	3.9		4.09	4.84
	4.48	2.97		3.94	4.15
	3.98	3.06		4.26	4.21
	4.89	2.38		4.5	4.98
	4.71	2.76		3.68	4.97
	3.76	2.77		4.19	3.78
	4.38	3.57		4.24	4.19
	3.78	3.89		4.52	3.9
	3.91	3.76		3.84	4.92
	3.7	3.75		4.71	4.64
	4.29	2.9		4.59	4
	4.94	3.06		4.21	3.91
	4.64	3.42		4.82	4.67
	4.96	2.8		3.69	3.84
	3.63	2.63		4.6	3.94
	3.89	3.51		4.82	4.5
	4.47	3.61		4.65	4.12
	4.56	3.18		4.99	4.55
	4.02	2.85		4.74	4.82
	4.41	3.54		4.7	4.76
	3.8	3.62		4.21	4.3
	4.98	2		4.18	4.74
	4.66	3.63		3.61	4.72
	4.51	3.25		4.53	4.87
	3.51	2.9		4.95	4.74
	3.7	3.39		4.58	3.88
	3.55	2.3		4.4	4
	3.52	2.55		4.66	4.04
	4.8	3.9		3.89	4.74
	4.43	2.18		4.49	4.45
	4.15	3.05		3.92	4.25
	4.78	3.7		4.71	4.95
	4.43	2.5		4	4.3
	4.83	3.37		4.24	3.87
	4.77	3.79		4.16	4.84
	3.87	2.25		4.96	4.38
	4.03	2.29		4.3	4.83
	4.72	3.09		3.91	3.96
	4.6	2.39		4.86	4.25
	3.64	3.81		4.77	4.41
	3.54	2.17		3.78	4.34
	3.82	3.72		3.78	4.89
	3.84	3.45		4	4.91
	4.35	3		3.88	4.39
	4.56	3.9		4.55	4.3
	3.9	3.47		4.94	4.67
	4.81	2.83		4.02	4
	4.37	2.37		3.79	4.75
	4.03	3.66		4.95	4.68
	3.52	2.98		4.05	3.73
	4.04	3.75		4.93	3.85
	4.69	2.75		4.22	3.78
	4.12	3.3		3.98	4.54
	4.61	2.01		4.39	4.14
	3.89	2.55		4.69	3.99
	4.69	3.2		3.83	4.94
	4.51	3.87		4.19	4.08
	4.08	3.23		4.59	4.9
	4.29	2.98		4.66	4.91
	4.97	3.64		4.13	3.88
	3.77	2.29		4.99	4.74
	4.51	3.83		4.44	4.56
	3.72	2.31		3.72	3.92
	4.69	3.27		3.69	4.97
	4.91	2.01		4.54	4.29
	3.69	2.7		4.84	4.17
	4.16	2.87		3.91	4.09
	3.75	2.56		3.88	4.39
	4.46	3.35		4.65	4.48
	4.61	2.41		4.53	4.92
	4.72	3.27		4.51	4.59
	4.79			4.57
	4.42
	4.27534	3.07		4.34347	4.40845
	0.447428	0.5654		0.39925	0.387437
	4.27534	3.07		4.34347	4.40845
	0.447428	0.5654		0.39925	0.387437
control	4.27534	4.34347
chitin	3.07	4.40845
	0.447428	0.39925
	0.5654	0.387437

## Sheet: 1B rep3
	col-0 control	col-0 chitin		pbl27-1 control	pbl27-1 chitin
	4.76	3.12		4.75	3.41
	3.83	3.83		4.78	3.72
	4.29	2.8		3.88	3.71
	4.9	3.24		4.4	4.11
	4.48	2.84		4.47	5
	3.76	3.9		4.94	3.56
	3.54	3.59		3.89	4.72
	4.34	3.87		3.41	5.27
	3.32	3.47		4.15	4.5
	4.81	3.22		4.01	4.33
	4.03	3.73		4.38	4.87
	3.55	3.38		4.3	3.9
	4.26	3.31		3.7	4.82
	3.74	3.9		5.13	4.88
	3.64	2.9		3.63	4.51
	3.94	3.43		3.9	4.98
	3.35	3.5		4.08	3.5
	3.39	3.81		4.78	3.55
	4.83	3.14		4.28	3.4
	4.57	3.12		4.77	4.29
	4.79	3.55		3.94	5.1
	4.59	3.17		3.41	3.32
	4.84	3.26		3.77	3.31
	4.19	3.69		3.59	3.78
	3.49	3.17		5.08	4.7
	4.74	3.43		4.47	3.9
	3.48	3.04		4.6	3.38
	3.37	3.88		3.51	5.22
	3.61	3.73		3.89	3.94
	4.35	3.15		4.97	4.84
	3.39	3.24		3.89	3.66
	3	2.92		3.93	3.6
	4.44	3.6		5.2	5.29
	4.59	3.49		5.01	5.06
	4.82	3.27		4.97	4.31
	3.77	2.98		3.71	3.59
	4.76	3.59		4.65	4.84
	4.36	2.93		3.6	3.89
	4.46	2.81		4.68	3.95
	4.97	3.3		4.86	3.51
	4.99	3.18		3.5	3.76
	3.32	3.45		3.34	5.03
	4.11	3.37		4.17	4.69
	3.86	3.15		3.37	4.37
	3.62	3.75		3.93	5.28
	4.13	3.6		5.28	3.68
	4.78	2.79		5.15	5.05
	4.46	2.82		5	3.83
	4.17	3.56		4.03	3.96
	3.58	3.23		3.37	4.86
	4.26	3.37		4.34	4.04
	4.34	3		4.78	4.79
	4.62	3.54		3.66	4.75
	4.95	3.25		3.94	4.79
	3.95	3.49		4.95	4.55
	4.25	3.42		4.37	3.81
	4.47	3.78		3.5	3.63
	3.73	3.84		3.89	4.29
	4.46	3.26		4.83	4.06
	4.18	3.71		4.98	3.39
	4.86	3.51		4.98	3.97
	3.64	3.14		4.72	5.2
	4.36	3.97		4.24	4.7
	4.13	3.6		4.88	4.99
	3.71	3.14		3.43	4.25
	4.38	3.87		3.59	4.29
	4.44	3.48		5.13	3.68
	3.94	2.79		5.11	4.52
	4.85	3.48		4.85	4.21
	4.12	3.31		3.75	3.88
	4.34	3.2			4.29
	3.69	2.77			5.17
	3.55	3.7
		2.96
	4.15863	3.36189		4.29171	4.2775
	0.513242	0.326252		0.590708	0.600398
	4.15863	3.36189		4.29171	4.2775
	0.513242	0.326252		0.590708	0.600398
control	4.15863	4.29171
chitin	3.36189	4.2775
	0.513242	0.590708
	0.326252	0.600398

## Sheet: 1C rep1
	col-0 control	col-0 chitin		slac1-3 control	slac1-3 chitin		slah3-1 control	slah3-1 chitin
	4.17	3.94		4.61	2.49		4.54	4.06
	3.9	2.5		4.96	2.99		4.17	4.13
	3.8	3.53		4.5	2.22		3.62	3.65
	3.76	4.03		4.56	3.42		4.6	4.72
	4.65	2.88		4.72	3.53		4.46	3.55
	4.01	3.4		4.11	2.38		4.3	3.68
	3.93	3.69		4.96	3.14		4.84	4.28
	5	3.08		3.95	2.12		3.82	4.36
	4.28	3.29		4.43	2.47		3.79	4.99
	4.43	3.51		4.77	2.69		3.7	4.52
	4.72	2.26		4.41	3.38		4.3	4.34
	4.81	3.48		3.67	3.34		4.21	3.5
	4.26	3.73		3.67	2.11		4.58	4.26
	3.63	3.85		4.25	3.6		4.31	4.4
	4.75	2.4		3.75	3.52		3.42	4.75
	3.78	3.15		4.92	2.59		4.86	3.78
	4.6	3.09		3.82	2.18		3.94	4.58
	4.93	3.39		3.72	2.44		3.95	4.64
	4.54	2.36		4.57	3.51		4.8	3.89
	4.59	2.23		3.91	3.1		3.79	4.82
	4.93	2.56		3.75	3.94		4.19	4.89
	3.91	2.43		4.45	2.2		4.89	3.7
	3.68	3.26		4.38	2.92		4.75	3.7
	4.75	3.83		4.9	3.69		3.86	4.22
	3.74	2.41		4.21	4.05		4.24	4.18
	3.71	2.7		4.76	2.78		4	4.69
	4.82	3.89		4.72	3.74		3.61	3.97
	4.26	2.5		4.12	3.14		4.19	3.93
	4.09	2.81		4.3	2.22		4.34	3.92
	3.83	2.87		3.78	3.13		4.45	3.9
	4.5	3.07		3.74	3.9		4.43	4.63
	4.39	3.03		4.16	3.6		3.94	3.5
	4.75	3.25		4.15	2.08		3.75	4.58
	3.87	3.14		4.02	4.01		3.44	4.02
	4.46	3.31		4.25	2.01		3.69	4.7
	3.61	3.7		3.89	3.17		4.06	4.81
	4.6	3.19		4.21	3.45		4.63	4.36
	3.98	3.54		4.18	2.75		4.89	4
	4.96	3.55		3.7	3.23		4.78	3.76
	4.38	2.51		4.89	2.53		3.48	4.87
	4.89	3.2		4.94	2.2		3.48	4.07
	3.71	2.68		4.97	3.7		4.75	4.62
	4.56	3.06		3.51	3.97		3.54	4.51
	4.94	3.43		4.23	3.36		3.65	4.71
	4.67	2.56		4.87	3.72		4.97	3.53
	4.57	2.21		3.74	4.07		3.96	4.12
	4.26	2.65		4.59	2.58		4.75	4.2
	4.4	3.91		3.71	3.52		4.73	3.77
	4.5	2.27		3.82	3.43		4.26	3.58
	4.45	4		4.02	3.26		4.4	3.86
	4.85	2.23		4.47	3.3		4.32	3.71
	4.52	2.34		4.76	3.36		4.62	4.28
	4.08	3.66		4.91	3.4		3.82	4.87
	4.8	2.37		4.6	3.77		4.75	3.91
	3.96	3.81		3.8	4.08		4.16	3.96
	4.12	2.49		4.77	3.72		4.37	4.54
	4.85	2.98		4.13	2.3		3.52	3.54
	4.26	3.71		4.93	3.74		4.79	3.95
	4.47	3.11		3.81	3.89		4.61	3.86
	3.63	2.75		4.48	3.92		3.44	4.85
	4.01	2.72		4.31	2.09		3.94	4.22
	4.79	3.7		4.74	3.46		4.57	4.43
	4.8	3.34		4.1	2.91		3.78	3.85
	4.68	2.39		4.85	2.22		3.99	3.59
	3.94	3.79		4.34	3.97		4.1	4.68
	4.78	3.63		4.76	2.42		4.06	3.89
	4.44	3.01		4.42	2.8		4.84	4.99
	4.33	3.85		4.93	3.05		4.63	4.6
	3.93	2.85		4.33	3.39		3.96	4.62
	4.31	3.62		3.56	3.97		4.39	4.83
	3.73	3.68		4.81	3.94		3.99	5
	4.73	3.47		3.98	3.8		3.92	3.76
	4.32	3.73		3.99	3.07		4.3
	3.64	3.01			2.88		4.53
	4.88				3.84		4.11
	4.3				2.12
					4.02
	4.34026	3.12905		4.31507	3.15584		4.20813	4.22403
	0.414658	0.543787		0.433821	0.63586		0.43561	0.448706
	4.34026	3.12905		4.31507	3.15584		4.20813	4.22403
	0.414658	0.543787		0.433821	0.63586		0.43561	0.448706
control	4.34026	4.31507	4.20813
chitin	3.12905	3.15584	4.22403
	0.414658	0.433821	0.43561
	0.543787	0.63586	0.448706

## Sheet: 1C rep2
	col-0 control	col-0 chitin		slac1-3 control	slac1-3 chitin		slah3-1 control	slah3-1 chitin
	4.41	3.07		4.45	2.78		4.62	4.58
	4.2	3.47		4.02	2.01		4.17	4.44
	3.84	2.92		3.95	3.62		4.01	3.92
	4.74	3.59		3.51	3.27		4.9	4.49
	3.67	3.67		4.7	3.48		4.99	4.92
	4.38	4.06		3.6	2.21		3.7	4.92
	4.13	4.11		4.46	2.94		4.2	3.84
	3.63	4.09		3.71	3.42		4.63	4.58
	3.53	3.94		4.94	2.34		4.64	4.23
	4.43	4.08		4.92	2.62		3.79	4.42
	4.11	3.71		4.1	3.36		4.77	4.66
	4.31	3.35		3.89	3.47		4.79	3.94
	3.67	2.96		4.6	3.46		3.97	4.5
	4.52	2.91		3.69	2.52		4.74	4.15
	3.52	2.26		4.64	3.83		4.86	4.61
	4.99	2.81		4.26	2.11		4.98	5
	4.64	3.16		4.36	2.92		3.85	3.87
	3.91	2.46		3.69	3.06		4.8	3.76
	3.63	3.06		4.38	2.11		4.63	4.31
	4.3	2.12		4.12	3.62		4.39	3.83
	4.62	2.52		4.49	2.22		4.38	3.91
	4.43	2.8		4.85	3.38		3.7	4.62
	4.33	2.99		3.52	2.04		4.08	4.06
	3.43	3.7		4.2	3.81		3.63	3.92
	3.54	2.22		4.05	2.21		4.43	3.81
	4.28	2.38		4.66	2.47		4.72	4.81
	3.55	3		4.06	3.75		4.12	3.85
	4.09	2.71		4.53	3.08		4.03	3.72
	4.99	2.75		3.95	3.05		4.24	4.32
	3.43	2.72		4.59	3.51		3.74	4.83
	4.86	2.05		3.84	3.39		3.7	4.29
	3.99	2.25		4.72	2.59		3.61	3.86
	3.83	3.05		4.62	2.23		3.69	4.64
	4.52	2.19		4.13	2.9		3.92	4.85
	4.42	2.15		4.5	3.45		4.25	4.13
	3.76	3.86		3.94	3.81		4.06	4.7
	4.39	2.62		4.43	3.79		3.84	4.39
	3.44	2.36		4.16	2.5		4.84	4.35
	4.91	2.79		3.59	2.57		3.74	3.84
	3.95	2.7		3.65	2.97		3.62	4.46
	4.97	3.54		4.27	3.25		3.83	4.53
	4.09	2.85		4.33	3.07		3.98	4.7
	4.55	2.9		3.54	3.53		4.99	3.97
	5	2.65		3.74	3.66		4.96	4.9
	4.69	3.44		4.91	3.59		4.18	3.88
	4.91	3.56		3.69	2.57		3.65	4.05
	3.66	2.92		4.56	3.03		4.84	4.15
	4.24	2.79		3.81	3.28		4.95	3.78
	4.8	2.26		4.22	2.57		4.88	4.97
	4.35	2.77		5	2.18		4.31	4.62
	3.79	2.36		3.91	3.45		4.69	4.35
	4.97	3.81		4.07	2.99		3.81	4.94
	4.73	2.41		4.79	3.69		4.13	3.99
	3.76	2.88		4.28	3.83		4.4	3.84
	3.97	3.33		4.05	2.58		4.65	4.33
	4.2	2.17		3.7	3.17		4.05	4.43
	3.77	2.05		4.23	3.79		3.64	4.79
	3.44	3.4		3.72	3.74		4.59	4.04
	4.11	2.21		4.76	2.37		4.19	4.42
	3.62	2.92		4.34	2.39		4.45	4.54
	4.08	3.51		4.15	2.04		3.95	3.74
	3.5	3.48		4.51	2.73		4.73	4.19
	3.94	2.01		4.15	3.14		4.38	4.12
	4.75	3.82		4.12	3.67		4.84	3.98
	3.63	2.89		4.87	2.54		4.14	3.71
	4.18	2.24		4.65	3.28		4.94	3.85
	3.91	2.06		4.1	3.01		3.8	4.32
	4.24	3.97		4.02	3.27		4.61	4.1
	3.69	2.02		3.56	2		4.31	3.71
	4.26	2.28		4.75	3.14		4.15	3.81
	4.86	2.69		4.99	2.73		4.14	4.15
	4.37	2.93		4.41	2.25			3.86
	4.1	3.07		4.97	3.21			3.8
	3.41	2.37			3.72
		3.89			3.58
	4.16027	2.93413		4.24164	3.01213		4.29479	4.25877
	0.475432	0.612037		0.42451	0.564787		0.439161	0.384621
	4.16027	2.93413		4.24164	3.01213		4.29479	4.25877
	0.475432	0.612037		0.42451	0.564787		0.439161	0.384621
control	4.16027	4.24164	4.29479
chitin	2.93413	3.01213	4.25877
	0.475432	0.42451	0.439161
	0.612037	0.564787	0.384621

## Sheet: 1C rep3
	col-0 control	col-0 chitin		slac1-3 control	slac1-3 chitin		slah3-1 control	slah3-1 chitin
	4.32	4.07		5	3		4.62	4.87
	4.41	3.61		3.72	3.07		3.84	3.62
	4.11	2.91		4.24	2.76		4.82	3.62
	4.32	3.41		4.08	3.48		5.24	4.3
	4.64	3.05		4.75	3.93		3.81	4.41
	4.39	3.19		4.92	3.7		4.63	4.36
	3.69	2.62		5.3	2.85		4.83	5.25
	4.06	3.03		4.6	3.19		3.93	4.35
	4.4	4.05		4.91	3.47		4.12	5.14
	5.36	2.88		3.67	3.47		4.93	4.11
	3.69	3.89		3.43	3.19		4.99	3.65
	5.24	2.79		5.16	4		4.16	3.73
	3.62	3.74		4.09	2.96		4.99	4.17
	3.66	3.55		4.86	3.02		5.05	5.38
	5.31	4.11		4.65	2.71		3.92	5.38
	4.66	2.89		5.34	2.28		4.37	3.62
	3.57	2.33		5.07	3.83		5.35	4.22
	4.46	3.09		4.99	3.6		4.41	5.29
	3.45	3.52		3.4	2.85		3.79	3.91
	4.65	4.09		3.92	2.45		4.04	5.09
	4.8	3.07		5.37	3.89		3.93	3.82
	4.82	4.19		5.2	3.27		5.12	4.62
	3.99	3.4		4.92	3.9		4.71	4.06
	5.27	3.44		3.43	3.77		4.83	5.4
	5.29	4.05		3.94	2.99		4.65	3.54
	5.11	4.03		4.46	3.97		4.22	4.38
	3.7	2.36		4.38	2.32		3.42	3.61
	4.52	2.98		3.86	2.36		3.72	3.76
	3.59	3.55		4.04	3.04		3.97	5.29
	3.47	3.62		4.25	2.4		5.3	4.61
	4.04	4.06		4.58	2.93		4.72	4.27
	4.44	3.24		3.55	2.71		5.22	4.55
	4.45	2.53		4.11	3.43		4.01	4.69
	4.29	3.77		3.84	2.86		5.21	4.47
	5.32	2.99		4.26	3.95		3.67	5.02
	5.18	3.91		4.19	2.66		4.27	4.33
	4.26	3.5		3.99	2.96		4.22	5.25
	4.24	3.42		5.15	3.22		4.94	4.02
	4.98	2.74		4.77	2.51		4.34	4
	4.06	2.74		5.35	3.55		3.81	5.15
	3.45	3.04		4.74	2.29		4.29	3.58
	3.99	2.48		5.21	3.41		3.69	4.18
	4.55	2.82		3.82	2.37		3.43	4.48
	3.95	3.64		3.8	2.4		3.81	3.9
	3.74	2.47		4.32	2.29		4.51	5.16
	3.97	3.72		3.94	3.23		4.57	4.14
	5.31	2.21		3.68	3.68		5.19	4.79
	3.99	2.3		4.42	3.21		4.38	5.08
	5.34	3.56		5.38	4.11		3.84	3.93
	4.95	3.58		4.86	3.18		4.43	3.81
	4.55	3.68		5.27	3.51		3.49	4.7
	3.5	3.01		4.37	3.71		4.88	4.18
	4.3	2.88		5.12	2.49		4.22	4.87
	5.17	3.42		3.43	3.57		4.35	4.8
	4.33	2.21		4.33	3.83		4.61	3.47
	5.08	2.38		4.56	3.61		4.66	5.4
	4.37	3.96		3.8	2.7		5.21	4.54
	5.26	3.97		3.79	2.47		4.97	3.99
	5.23	3.75		4.82	3.33		4.09	3.65
	4.65	2.3		5.18	2.85		4.34	5.09
	4.19	2.32		3.86	3.44		5.08	3.71
	4.05	3.29		4.16	3.11		4.41	4.38
	5.39	2.59		3.61	3		3.88	3.78
	3.95	2.41		5.02	2.93		3.59	5.07
	4.73	3.7		3.53	2.4		4.39	3.87
	3.6	3.74		3.64	3.22		5.18	3.91
	3.99	3.4		5.13	3.74		4.84	3.51
	3.47	3.56		4.96	3.72		4.37	3.59
	3.87	2.26		4.22	2.81			3.92
	3.79	2.84		5.22	2.81			4.24
	3.56			4.02	2.73
	5.13
	4.37819	3.22714		4.42183	3.13592		4.42382	4.35757
	0.602542	0.585445		0.60615	0.516824		0.529542	0.58956
	4.37819	3.22714		4.42183	3.13592		4.42382	4.35757
	0.602542	0.585445		0.60615	0.516824		0.529542	0.58956
control	4.37819	4.42183	4.42382
chitin	3.22714	3.13592	4.35757
	0.602542	0.60615	0.529542
	0.585445	0.516824	0.58956

## Sheet: 4A rep1
	Col-0 control	Col-0 chitin	slah3-1 control	slah3-1 chitin	WT-1 control	WT-1 chitin	WT-2 control	WT-2 chitin	WT-3 control	WT-3 chitin	WT-4 control	WT-4 chitin	WT-5 control	WT-5 chitin	WT-6 control	WT-6 chitin
	5.08	2.75	4.33	4.5	3.67	3.81	4.1	3.64	4.99	3.79	4.83	3.79	4.72	2.9	4.53	3.26
	5.18	2.83	3.62	5.05	4.62	2.32	4.24	2.68	4.59	3.73	4.74	3.6	5.04	3.97	4.57	3.39
	4.35	2.87	4.77	4.68	4.59	2.33	5.09	3.08	4.18	3.95	4.27	3.96	3.87	3.98	4.86	2.94
	4.91	3.43	4.54	5.22	4	2.67	3.85	3.67	4.09	2.27	4.23	2.63	4.09	2.76	3.73	2.35
	3.73	3.5	5.23	5.19	4.03	2.64	5.17	3.84	3.79	3.48	4.24	3.95	5.4	3.85	3.9	3.45
	3.98	3.49	5.24	4.08	3.61	2.41	5.33	2.86	4.14	2.93	5.57	3.38	3.97	2.95	4.27	2.19
	4.13	2.74	4.69	4.52	4.15	3.63	4.69	2.16	4.39	3.9	5.03	2.71	4.9	2.48	5.4	3.37
	5.01	2.22	4.84	5.4	4.7	2.5	3.73	3.41	4.31	2.66	5.51	2.59	3.53	2.15	3.6	2.69
	4.98	2.2	5.38	3.68	4.02	3.03	5	3.89	3.95	3.82	5.36	2.78	4.46	2.42	5.49	3.67
	3.86	3.91	4.03	5.3	4.33	2.86	4.25	2.69	4.91	3.36	4.56	3.65	4	2.49	4.52	3.43
	4.54	3.28	5.15	4.28	5.35	2.45	4.91	2.21	5.11	2.99	4.41	2.78	4.51	2.97	5.49	2.95
	5.11	3.01	5.29	4.76	4.37	2.83	4.19	2.71	4.51	3.45	5.22	3.11	4.14	2.17	4.6	2.88
	5.16	4.04	4.19	4.59	5.47	3.23	4.06	2.03	5.04	2.34	5.17	2.99	3.93	3.21	5.37	3.39
	5.04	3.59	3.6	4.2	4.53	2.2	4.18	2.12	3.61	3.29	3.98	2.65	4.42	2.53	5.23	3.03
	4.15	3.16	5.2	4.22	3.97	2.04	5.08	2.98	3.77	3.76	3.99	3.35	4.29	2.12	4.64	3.77
	5.3	2.99	3.56	4.46	4.34	3.33	4.26	3.48	4.83	3.88	4.1	3.2	3.5	2.67	4.98	2.36
	3.95	2.27	3.74	4.54	5.59	2.97	3.5	3.74	4.32	3.79	5	3.16	5.21	2.38	4.61	3.19
	5.24	2.44	5.21	3.65	3.71	4.04	4.02	2.86	4.27	3.08	4.24	3.27	5.43	3.5	5.61	2.59
	5.46	2.31	3.82	5.28	5.57	3.43	5.25	2.62	5.17	3.47	5.43	3.2	4.15	3.13	4.5	3.32
	4.38	4.02	4.92	4.42	5.33	2.2	4.51	2.6	4.96	3.28	4.5	3.01	5.57	2.29	4.59	3.21
	5.14	3.08	3.6	4.44	5.29	3.97	4.76	2.5	4.29	2.39	5.58	3.97	4.98	3.27	4.77	2.61
	4.81	3.54	4.42	3.92	4.66	2.47	5.05	3.69	4.34	2.63	5.01	3.99	4.16	3.55	5.2	3.08
	5.26	3.24	4.61	4.9	4.86	2.96	5.08	3.1	5.39	3.15	4.05	2.95	4.34	3.39	4.98	3.07
	5.17	3.7	4.85	4.09	3.78	3.77	4.23	3.13	5.19	3.96	5.29	3.92	5.44	3.64	5.32	3.13
	4.21	2.43	4.78	5.24	3.97	2.59	4.86	2.25	5.47	3.24	5.08	2.34	4.73	2.15	5.39	3.88
	4.23	4.06	4.12	4.73	5.23	3.69	4.4	2.5	5.58	3.15	4.07	2.95	4.28	3.73	4.71	2.78
	4.65	3.34	4.92	5.03	3.49	2.53	4.16	3.13	3.6	2.7	4.3	4	3.78	3	4.31	3.85
	4.15	2.41	4.75	4.28	5.51	2.43	4.9	3.57	4.99	2.69	5.26	2.81	5.18	3.15	5.03	2.28
	4.46	3.1	4.05	5.12	3.65	3.14	3.76	3.84	4.7	2.83	3.79	2.31	5.15	3.08	4.35	2.54
	4.47	4.06	4.88	4.8	3.95	3.86	3.51	3.05	4.2	2.47	4.38	2.13	5.49	2.96	4.04	3.41
	4.45	3.36	4.2	4.03	4.75	3.14	3.82	3.32	4.38	2.61	4.22	3.62	4.01	2.42	4.26	2.92
	5.16	3.6	3.54	3.78	3.43	3.6	5.12	2.02	3.89	3.53	5.09	3.58	3.56	2.34	4.95	3.45
	4	2.71	4.88	4.07	5.06	2.14	4.99	2.69	3.71	2.78	4.09	3.81	3.95	2.36	4.42	2.66
	5.49	4.02	4.73	4.6	3.84	3.21	4.12	3.56	3.66	3.11	4.83	2.97	5.09	2.85	5.2	2.19
	4.13	2.3	4.86	4.47	5.01	3.52	3.74	3.65	4.12	3.88	5.14	3.9	4.35	3.2	4.67	2.93
	4.11	2.25	3.61	4.35	4.25	2.87	4	2.16	5.31	3.81	3.73	2.33	3.67	3.52	4.19	3.19
	4.14	2.21	3.8	4.62	4.18	3.74	4.9	2.2	4.22	2.87	4.86	2.44	3.57	2.29	4.1	3.38
	3.9	2.53	3.87	4.51	4.94	3.97	4.12	3.06	3.76	2.55	5.1	2.27	5.54	2.37	3.85	2.21
	3.87	3.44	4.64	3.68	4.51	3.78	4.22	2.7	4.73	3.61	4.4	2.88	4.82	3.97	3.67	2.84
	3.89	2.61	3.64	3.74	3.83	2.84	4.38	3.64	3.95	3.44	3.97	3.93	4.03	2.24	4.23	3.24
	4.48	2.83	5.25	4.96	5.47	3.51	3.95	2.33	5.24	3.18	4.31	2.29	5.59	3.3	4.83	2.64
	3.62	3	4.49	3.67	4.12	3.11	4.34	2.87	4.01	2.39	4.5	2.49	4.23	2.5	4.18	3.57
	4.26	4.08	4.04	4.8	4.18	2.47	4.52	2.72	4.48	2.78	4.5	3.45	4.98	2.41	5.23	2.89
	4.67	3.23	3.59	5.14	5.13	2.16	5.22	2.09	3.61	3.67	4.36	3.34	5.43	3.81	4.57	2.4
	3.85	2.62	5.12	4.43	3.42	2.58	4.05	2.32	4.89	3.31	3.87	2.92	4.56	3.88	4.73	3.78
	4.83	3.27	4.24	4.94	5.01	2.45	5.22	3.83	3.88	2.37	4.68	2.47	5.24	2.95	4.51	2.13
	4.79	4.03	3.71	4	4.23	2.02	4.87	2.41	4.58	2.88	4.52	2.9	5.04	3	5.23	2.63
	5.18	2.87	3.56	4.16	4.11	3.7	5.39	2.79	4.45	2.47	3.75	2.49	5.04	3.73	4.04	2.85
	3.74	3.35	4.75	5.07	5.37	3.37	3.72	3.33	5.08	2.66	4.25	2.67	4.18	3.51	4.35	3.38
	3.66	2.67	5	4.69	3.71	2.35	3.58	2.37	4.58	2.73	4.67	2.71	5.52	2.83	3.8	3.1
	3.83	3.4	5.11	3.63	5.5	3.37	3.78	2.57	5.42	2.27	4.97	2.53	3.47	3.27	4.51	3.89
	4.56	3.96	4.9	4.77	5.37	2.77	4.6	3.11	4.93	2.87	5.48	3.73	4.5	2.12	4.79
		3.38	5.09			3.02	4.61	2.54	4.15			3.05	5.16	2.73
		2.96	5.07				4.99	3.08				2.98	3.7
							3.77
	4.51346	3.12389	4.48185	4.51308	4.49538	2.98151	4.43891	2.91463	4.48509	3.11923	4.62462	3.09037	4.55352	2.9517	4.63269	3.02608
	0.546956	0.578653	0.594792	0.49906	0.66574	0.589029	0.545401	0.562718	0.558992	0.523689	0.529659	0.554311	0.653014	0.57468	0.520754	0.482792
	4.51346	3.12389	4.48185	4.51308	4.49538	2.98151	4.43891	2.91463	4.48509	3.11923	4.62462	3.09037	4.55352	2.9517	4.63269	3.02608
	0.546956	0.578653	0.594792	0.49906	0.66574	0.589029	0.545401	0.562718	0.558992	0.523689	0.529659	0.554311	0.653014	0.57468	0.520754	0.482792
control	4.51346	4.48185	4.49538	4.43891	4.48509	4.62462	4.55352	4.63269
chitin	3.12389	4.51308	2.98151	2.91463	3.11923	3.09037	2.9517	3.02608
	0.546956	0.594792	0.66574	0.545401	0.558992	0.529659	0.653014	0.520754
	0.578653	0.49906	0.589029	0.562718	0.523689	0.554311	0.57468	0.482792

[truncated: 22 more sheets: 4A rep2, 4A rep3, 4B rep1, 4B rep2, 4B rep3, 4C rep1, 4C rep2, 4C rep3, 4D rep1, 4D rep2, 4D rep3, 1-S1 CERK1 rep1, 1-S1 CERK1 rep2, 1-S1 CERK1 rep3, 1-S1 LYK5 rep1, 1-S1 LYK5 rep2, 1-S1 LYK5 rep3, 1-S1 PBL27 rep1, 1-S1 PBL27 rep2, 1-S1 PBL27 rep3 …]
