# Supplementary material for: Anion channel SLAH3 is a regulatory target of chitin receptor-associated kinase PBL27 in microbial stomatal closure
Source: eLife journal article supplement (doi:10.7554/elife.44474), 2019-09-16
Supplement: supp [file elife-44474-supp-v1.zip › elife_poa_e44474_Figure_3_figure_supplement_3.pdf]

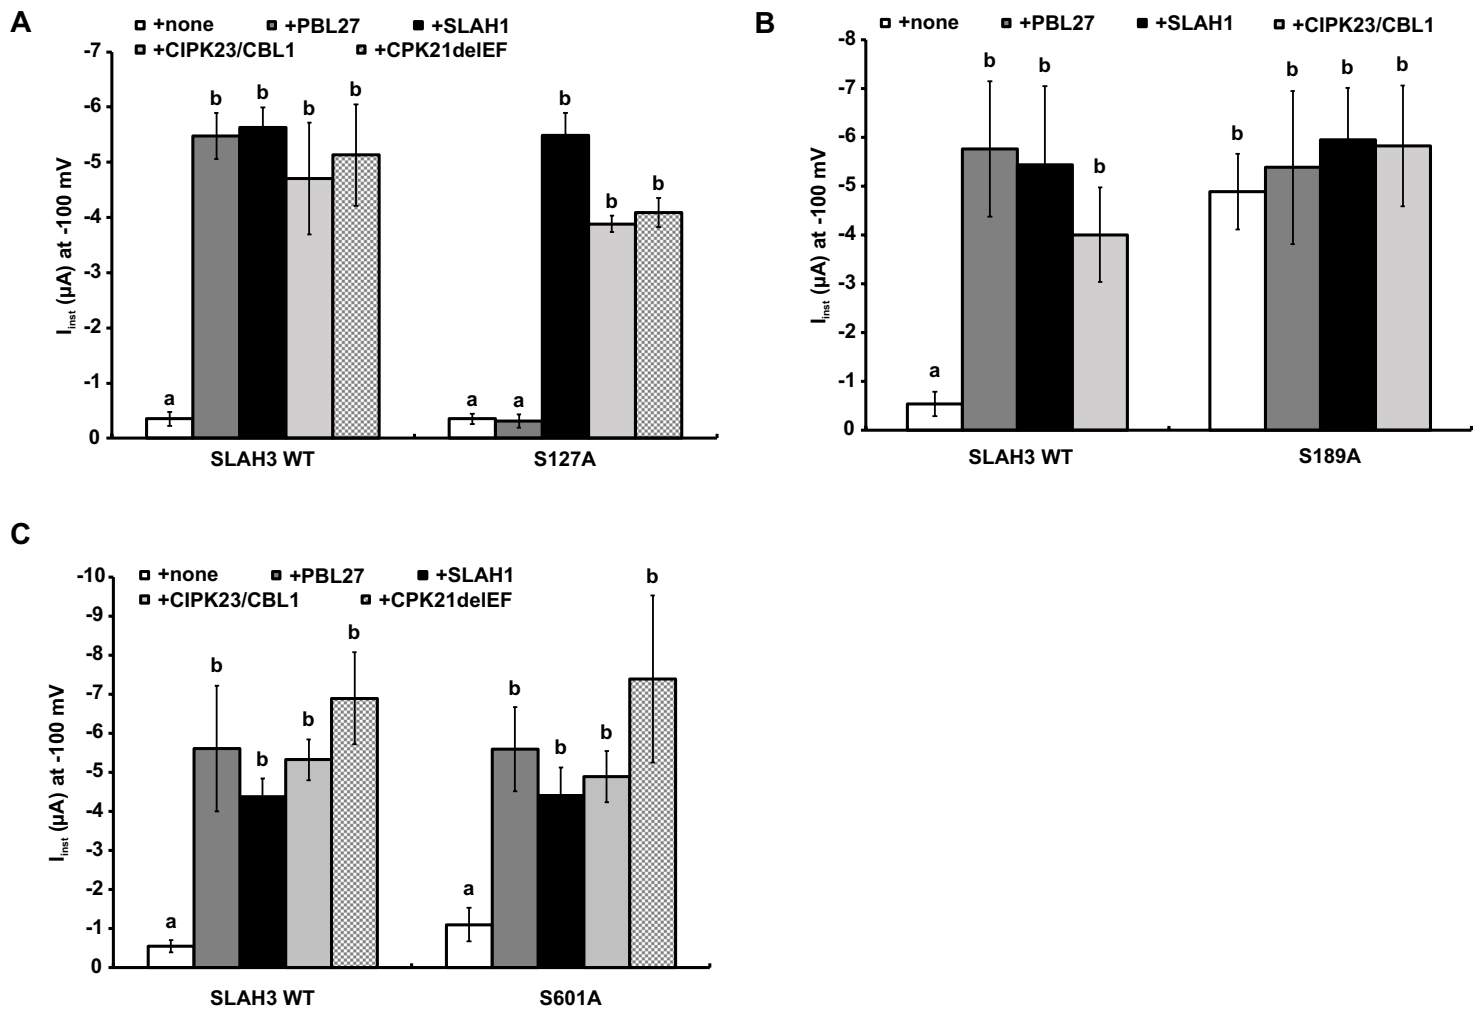

**Figure 3-figure supplement 3. Activation of SLAH3 wild type and the SLAH3 mutants S127A, S189A and S601A.** (A), (B) and (C) Instantaneous currents of *Xenopus* oocytes injected with WT SLAH3 or (A) S127A, (B) S189A or (C) S601A alone or together with PBL27, CIPK23/CBL1, CPK21DEF or SLAH1. (A) As PBL27 represents the only kinase that could not activate the mutant SLAH3 S127A, this phosphorylation site seems to be specific for PBL27. Currents were recorded at -100 mV in 100 mM nitrate containing buffers (n = 4 experiments, mean  $\pm$  SD). (B) None of the co-injected kinases or SLAH1 could further activate the constitutive active mutant S189A. Currents were recorded at -100 mV in 100 mM nitrate containing buffers (n = 4 experiments, mean  $\pm$  SD). (C) The mutant S601A could be activated by all tested kinases as well as by SLAH1 similar to WT SLAH3. Currents were recorded at -100 mV in 100 mM nitrate containing buffers (n = 4 experiments, mean  $\pm$  SD). Significant differences (ANOVA with Tukey's HSD test,  $P < 0.01$ ) between bars are denoted with different letters.
