# Supplementary material for: Anion channel SLAH3 is a regulatory target of chitin receptor-associated kinase PBL27 in microbial stomatal closure
Source: eLife journal article supplement (doi:10.7554/elife.44474), 2019-09-16
Supplement: supp [file elife-44474-supp-v1.zip › elife_poa_e44474_Figure_3_source_data_1.xlsx]

## Sheet: 3B
+none	+PBL27	+PBL27 K112E	+CIPK23/CBL1	+CPK21delEF
-0.51	-6.85	-0.2	-8.62	-4.28
-0.6	-8.8	-1.59	-7.12	-6.83
-0.64	-7.11	-0.38	-6.46	-8.99
-0.4	-5.48	-0.8	-7.45	-7.53
	-5.89	-0.35	-6.18	-5.15
				-6.23
-0.5375	-6.826	-0.664	-7.166	-6.50167	mean
0.0922971	1.15462	0.504087	0.856448	1.53806	SD
One-Way Anova		DF	Sum of Squares	Mean Square	F Value	Prob>F
	Model	4	222.859	55.7147	43.137	1.45622e-09
	Error	20	25.8315	1.29158
	Total	24	248.69
Fit Statistics	R-Square	Coeff Var	Root MSE	Data Mean
	0.89613	-0.24827	1.13648	-4.5776
Tukey Test		MeanDiff	SEM	q Value	Prob	Alpha	Sig	LCL	UCL
	B A	-6.2885	0.76237	11.6653	6.57369e-07	0.01	1	-9.1421	-3.4349
	C A	-0.1265	0.76237	0.23466	0.99981	0.01	0	-2.9801	2.7271
	C B	6.162	0.71877	12.124	3.6625e-07	0.01	1	3.4716	8.8524
	D A	-6.6285	0.76237	12.296	2.97763e-07	0.01	1	-9.4821	-3.7749
	D B	-0.34	0.71877	0.66897	0.98897	0.01	0	-3.0304	2.3504
	D C	-6.502	0.71877	12.793	1.64523e-07	0.01	1	-9.1924	-3.8116
	E A	-5.96417	0.73359	11.4977	8.21158e-07	0.01	1	-8.71005	-3.21829
	E B	0.32433	0.68817	0.66652	0.98912	0.01	0	-2.25153	2.9002
	E C	-5.83767	0.68817	11.9966	4.29037e-07	0.01	1	-8.41353	-3.2618
	E D	0.66433	0.68817	1.36523	0.86734	0.01	0	-1.91153	3.2402

## Sheet: 3C
+none	+PBL27	+PBL27 +LYK5	+PBL27 +CERK1	+PBL27 +LYK5 +CERK1	+LYK5	+CERK1
-0.32	-6.59	-6.398	-13.48	-10.502	-0.44	-0.08
-0.15	-3.83	-5.24	-7.24	-11.07	-0.16	-0.15
-0.21	-6.42	-5.602	-6.97	-10.9	-0.53	-0.11
-0.36	-6.45	-6.81	-9.001	-8.06	-0.12	-0.11
-0.47	-5.98	-6.23	-12.18	-8.59	-0.07	-0.36
-0.22	-6.104	-3.73	-5.85	-9.23
-0.52	-5.22	-3.81	-8.601	-6.36
-0.55	-4.46	-3.15	-6.45	-8.87
-0.31	-5.21	-5.82	-8.37	-7.82
-0.22	-5.06		-9.79	-5.93
-0.333	-5.5324	-5.19889	-8.7932	-8.7332	-0.264	-0.162	mean
0.132819	0.880245	1.24416	2.33621	1.68367	0.184889	0.101469	SD
One-Way Anova		DF	Sum of Squares	Mean Square	F Value	Prob>F
	Model	6	730.924	121.821	60.3275	0
	Error	52	105.005	2.01932
	Total	58	835.928
Fit Statistics	R-Square	Coeff Var	Root MSE	Data Mean
	0.87439	-0.29643	1.42103	-4.79386
Tukey Test		MeanDiff	SEM	q Value	Prob	Alpha	Sig	LCL	UCL
	B A	-5.1994	0.6355	11.5704	4.28962e-08	0.01	1	-7.52405	-2.87475
	C A	-4.86589	0.65292	10.5395	6.94567e-08	0.01	1	-7.25424	-2.47754
	C B	0.33351	0.65292	0.72238	0.99859	0.01	0	-2.05484	2.72186
	D A	-8.4602	0.6355	18.8269	0	0.01	1	-10.7849	-6.13555
	D B	-3.2608	0.6355	7.2564	8.52665e-05	0.01	1	-5.58545	-0.93615
	D C	-3.59431	0.65292	7.78525	2.29646e-05	0.01	1	-5.98266	-1.20596
	E A	-8.4002	0.6355	18.6933	0	0.01	1	-10.7248	-6.07555
	E B	-3.2008	0.6355	7.12288	0.00011818	0.01	1	-5.52545	-0.87615
	E C	-3.53431	0.65292	7.65529	3.17897e-05	0.01	1	-5.92266	-1.14596
	E D	0.06	0.6355	0.13352	1	0.01	0	-2.26465	2.38465
	F A	0.069	0.77833	0.12537	1	0.01	0	-2.7781	2.9161
	F B	5.2684	0.77833	9.57261	2.94566e-07	0.01	1	2.4213	8.1155
	F C	4.93489	0.79261	8.80505	1.78108e-06	0.01	1	2.03554	7.83424
	F D	8.5292	0.77833	15.4974	0	0.01	1	5.6821	11.3763
	F E	8.4692	0.77833	15.3884	0	0.01	1	5.6221	11.3163
	G A	0.171	0.77833	0.3107	0.99999	0.01	0	-2.6761	3.0181
	G B	5.3704	0.77833	9.75794	2.0267e-07	0.01	1	2.5233	8.2175
	G C	5.03689	0.79261	8.98704	1.13797e-06	0.01	1	2.13754	7.93624
	G D	8.6312	0.77833	15.6828	0	0.01	1	5.7841	11.4783
	G E	8.5712	0.77833	15.5738	0	0.01	1	5.7241	11.4183
	G F	0.102	0.89874	0.1605	1	0.01	0	-3.18555	3.38955

## Sheet: 3D
WT	WT+PBL27	S127D	S127D+PBL27	S189D	S189D+PBL27	S601D	S601D+PBL27
-0.35	-6.29	-0.88	-5.14	-0.87	-6.85	-0.43	-5.5
-0.3	-7.64	-0.41	-4.45	-0.65	-7.06	-0.45	-6.35
-0.73	-5.67	-0.36	-7.7	-0.72	-5.48	-0.34	-6.21
-0.71	-5.01	-0.71	-4.83	-0.29	-5.67	-0.56	-5.42
	-6.33
-0.5225	-6.188	-0.59	-5.53	-0.6325	-6.265	-0.445	-5.87	mean
0.198416	0.871192	0.21436	1.27646	0.213117	0.697227	0.0782624	0.413944	SD
One-Way Anova		DF	Sum of Squares	Mean Square	F Value	Prob>F
	Model	7	244.358	34.9083	64.5815	1.9984e-14
	Error	25	13.5133	0.54053
	Total	32	257.871
Fit Statistics	R-Square	Coeff Var	Root MSE	Data Mean
	0.9476	-0.21986	0.73521	-3.34394
Tukey Test		MeanDiff	SEM	q Value	Prob	Alpha	Sig	LCL	UCL
	B A	-5.6635	0.49319	16.2399	4.88558e-08	0.01	1	-7.63557	-3.69143
	C A	-0.0675	0.51987	0.18362	1	0.01	0	-2.14625	2.01125
	C B	5.596	0.49319	16.0464	4.91395e-08	0.01	1	3.62393	7.56807
	D A	-5.0075	0.51987	13.622	6.4857e-08	0.01	1	-7.08625	-2.92875
	D B	0.656	0.49319	1.88106	0.87866	0.01	0	-1.31607	2.62807
	D C	-4.94	0.51987	13.4384	7.0834e-08	0.01	1	-7.01875	-2.86125
	E A	-0.11	0.51987	0.29924	1	0.01	0	-2.18875	1.96875
	E B	5.5535	0.49319	15.9245	4.93401e-08	0.01	1	3.58143	7.52557
	E C	-0.0425	0.51987	0.11561	1	0.01	0	-2.12125	2.03625
	E D	4.8975	0.51987	13.3228	7.46714e-08	0.01	1	2.81875	6.97625
	F A	-5.7425	0.51987	15.6214	4.99385e-08	0.01	1	-7.82125	-3.66375
	F B	-0.079	0.49319	0.22653	1	0.01	0	-2.05107	1.89307
	F C	-5.675	0.51987	15.4378	5.03934e-08	0.01	1	-7.75375	-3.59625
	F D	-0.735	0.51987	1.99943	0.84252	0.01	0	-2.81375	1.34375
	F E	-5.6325	0.51987	15.3222	5.0727e-08	0.01	1	-7.71125	-3.55375
	G A	0.0775	0.51987	0.21082	1	0.01	0	-2.00125	2.15625
	G B	5.741	0.49319	16.4621	4.85711e-08	0.01	1	3.76893	7.71307
	G C	0.145	0.51987	0.39445	0.99999	0.01	0	-1.93375	2.22375
	G D	5.085	0.51987	13.8328	5.93363e-08	0.01	1	3.00625	7.16375
	G E	0.1875	0.51987	0.51006	0.99995	0.01	0	-1.89125	2.26625
	G F	5.82	0.51987	15.8323	4.95057e-08	0.01	1	3.74125	7.89875
	H A	-5.3475	0.51987	14.5469	5.42941e-08	0.01	1	-7.42625	-3.26875
	H B	0.316	0.49319	0.90612	0.99782	0.01	0	-1.65607	2.28807
	H C	-5.28	0.51987	14.3633	5.07678e-08	0.01	1	-7.35875	-3.20125
	H D	-0.34	0.51987	0.92491	0.99752	0.01	0	-2.41875	1.73875
	H E	-5.2375	0.51987	14.2477	5.22901e-08	0.01	1	-7.31625	-3.15875
	H F	0.395	0.51987	1.07453	0.99379	0.01	0	-1.68375	2.47375
	H G	-5.425	0.51987	14.7577	5.28808e-08	0.01	1	-7.50375	-3.34625

## Sheet: 3E
WT	WT+PBL27	S127D/S189D	S127D/S189D+PBL27	S127D/S601D	S127D/S601D+PBL27	S189D/S601D	S189D/S601D+PBL27
-0.83	-7.57	-6.04	-6.99	-0.44	-3.41	-0.25	-6.26
-0.56	-7.7	-6.25	-5.41	-0.45	-2.61	-0.24	-4.79
-0.17	-6.92	-5.24	-6.41	-0.57	-3.32	-0.62	-5.2
-0.29	-6.32	-6.14	-5.73	-0.94	-3.86	-0.62	-5.69
		-5.76
-0.4625	-7.1275	-5.886	-6.135	-0.6	-3.3	-0.4325	-5.485	mean
0.25489	0.551968	0.361641	0.611617	0.202855	0.447828	0.187533	0.549295	SD
One-Way Anova		DF	Sum of Squares	Mean Square	F Value	Prob>F
	Model	7	230.989	32.9985	138.809	0
	Error	25	5.94314	0.23773
	Total	32	236.933
Fit Statistics	R-Square	Coeff Var	Root MSE	Data Mean
	0.97492	-0.13018	0.48757	-3.74545
Tukey Test		MeanDiff	SEM	q Value	Prob	Alpha	Sig	LCL	UCL
	B A	-6.665	0.34476	27.3396	2.14109e-07	0.01	1	-8.04357	-5.28643
	C A	-5.4235	0.32707	23.4504	1.81718e-07	0.01	1	-6.73133	-4.11567
	C B	1.2415	0.32707	5.36806	0.01619	0.01	0	-0.06633	2.54933
	D A	-5.6725	0.34476	23.2684	1.80008e-07	0.01	1	-7.05107	-4.29393
	D B	0.9925	0.34476	4.0712	0.12013	0.01	0	-0.38607	2.37107
	D C	-0.249	0.32707	1.07664	0.99372	0.01	0	-1.55683	1.05883
	E A	-0.1375	0.34476	0.56402	0.9999	0.01	0	-1.51607	1.24107
	E B	6.5275	0.34476	26.7756	2.09873e-07	0.01	1	5.14893	7.90607
	E C	5.286	0.32707	22.8559	1.76061e-07	0.01	1	3.97817	6.59383
	E D	5.535	0.34476	22.7044	1.74587e-07	0.01	1	4.15643	6.91357
	F A	-2.8375	0.34476	11.6393	3.85545e-07	0.01	1	-4.21607	-1.45893
	F B	3.8275	0.34476	15.7003	4.97668e-08	0.01	1	2.44893	5.20607
	F C	2.586	0.32707	11.1815	7.60309e-07	0.01	1	1.27817	3.89383
	F D	2.835	0.34476	11.6291	3.9118e-07	0.01	1	1.45643	4.21357
	F E	-2.7	0.34476	11.0753	8.9645e-07	0.01	1	-4.07857	-1.32143
	G A	0.03	0.34476	0.12306	1	0.01	0	-1.34857	1.40857
	G B	6.695	0.34476	27.4627	3.85294e-08	0.01	1	5.31643	8.07357
	G C	5.4535	0.32707	23.5801	1.82926e-07	0.01	1	4.14567	6.76133
	G D	5.7025	0.34476	23.3914	1.81166e-07	0.01	1	4.32393	7.08107
	G E	0.1675	0.34476	0.68708	0.99963	0.01	0	-1.21107	1.54607
	G F	2.8675	0.34476	11.7624	3.24948e-07	0.01	1	1.48893	4.24607
	H A	-5.0225	0.34476	20.6021	4.49987e-08	0.01	1	-6.40107	-3.64393
	H B	1.6425	0.34476	6.73748	0.00152	0.01	1	0.26393	3.02107
	H C	0.401	0.32707	1.73386	0.91631	0.01	0	-0.90683	1.70883
	H D	0.65	0.34476	2.66628	0.57244	0.01	0	-0.72857	2.02857
	H E	-4.885	0.34476	20.0381	4.54778e-08	0.01	1	-6.26357	-3.50643
	H F	-2.185	0.34476	8.96279	3.02337e-05	0.01	1	-3.56357	-0.80643
	H G	-5.0525	0.34476	20.7252	4.4893e-08	0.01	1	-6.43107	-3.67393

## Sheet: 3F
WT	WT +PBL27	S127A	S127A +PBL27	S189A	S189A +PBL27	S601A	S601A +PBL27
-0.34	-8.3	-0.68	-1.29	-4.26	-3.36	-1.12	-4.32
-0.75	-4.75	-1.35	-1.47	-5.12	-5.91	-1.78	-7.29
-0.6	-3.46	-0.6	-0.6	-4.51	-2.61	-0.71	-5.42
-0.47	-4.9	-0.68	-1.05	-4.84	-5.79	-0.76	-5.32
	-5.12				-5.74
	-7.07
-0.54	-5.6	-0.8275	-1.1025	-4.6825	-4.682	-1.0925	-5.5875	mean
0.152151	1.6059	0.303428	0.326142	0.325759	1.40683	0.427281	1.07293	SD
One-Way Anova		DF	Sum of Squares	Mean Square	F Value	Prob>F
	Model	7	163.312	23.3303	19.6757	4.49694e-09
	Error	27	32.0151	1.18574
	Total	34	195.327
Fit Statistics	R-Square	Coeff Var	Root MSE	Data Mean
	0.8361	-0.33926	1.08892	-3.20971
Tukey Test		MeanDiff	SEM	q Value	Prob	Alpha	Sig	LCL	UCL
	B A	-5.06	0.70289	10.1807	2.42001e-06	0.01	1	-7.84416	-2.27584
	C A	-0.2875	0.76998	0.52805	0.99994	0.01	0	-3.3374	2.7624
	C B	4.7725	0.70289	9.60221	6.81444e-06	0.01	1	1.98834	7.55666
	D A	-0.5625	0.76998	1.03314	0.99518	0.01	0	-3.6124	2.4874
	D B	4.4975	0.70289	9.04892	1.85325e-05	0.01	1	1.71334	7.28166
	D C	-0.275	0.76998	0.50509	0.99995	0.01	0	-3.3249	2.7749
	E A	-4.1425	0.76998	7.60847	0.000260998	0.01	1	-7.1924	-1.0926
	E B	0.9175	0.70289	1.846	0.88897	0.01	0	-1.86666	3.70166
	E C	-3.855	0.76998	7.08042	0.00069175	0.01	1	-6.9049	-0.8051
	E D	-3.58	0.76998	6.57533	0.00175	0.01	1	-6.6299	-0.5301
	F A	-4.142	0.73047	8.01906	0.00012231	0.01	1	-7.03539	-1.24861
	F B	0.918	0.65937	1.96891	0.8529	0.01	0	-1.69378	3.52978
	F C	-3.8545	0.73047	7.46245	0.000341815	0.01	1	-6.74789	-0.96111
	F D	-3.5795	0.73047	6.93004	0.000912376	0.01	1	-6.47289	-0.68611
	F E	0.0005	0.73047	0.000968018	1	0.01	0	-2.89289	2.89389
	G A	-0.5525	0.76998	1.01477	0.99568	0.01	0	-3.6024	2.4974
	G B	4.5075	0.70289	9.06904	1.7867e-05	0.01	1	1.72334	7.29166
	G C	-0.265	0.76998	0.48672	0.99996	0.01	0	-3.3149	2.7849
	G D	0.01	0.76998	0.01837	1	0.01	0	-3.0399	3.0599
	G E	3.59	0.76998	6.5937	0.00169	0.01	1	0.5401	6.6399
	G F	3.5895	0.73047	6.9494	0.000880461	0.01	1	0.69611	6.48289
	H A	-5.0475	0.76998	9.27067	1.23943e-05	0.01	1	-8.0974	-1.9976
	H B	0.0125	0.70289	0.02515	1	0.01	0	-2.77166	2.79666
	H C	-4.76	0.76998	8.74262	3.23873e-05	0.01	1	-7.8099	-1.7101
	H D	-4.485	0.76998	8.23753	8.17869e-05	0.01	1	-7.5349	-1.4351
	H E	-0.905	0.76998	1.6622	0.93215	0.01	0	-3.9549	2.1449
	H F	-0.9055	0.73047	1.75308	0.91243	0.01	0	-3.79889	1.98789
	H G	-4.495	0.76998	8.2559	7.90694e-05	0.01	1	-7.5449	-1.4451

## Sheet: 3G
WT +none	WT +PBL27	WT +PBL27 +LYK5 +CERK1	S189A +none	S189A +LYK5 +CERK1	S189A +PBL27	S189A +PBL27 +LYK5 +CERK1
-0.21	-3.04	-8.21	-2.16	-3.01	-4.55	-3.59
-0.13	-4.85	-7.48	-3.02	-1.87	-3.31	-2.62
-0.201	-4.43	-6.79	-2.86	-3.47	-4.83	-4.08
-0.17	-3.41	-7.13	-4.66	-2.55	-4.01	-4.08
		-5.44	-2.47			-3.58
-0.17775	-3.9325	-7.01	-3.034	-2.725	-4.175	-3.59	mean
0.0313079	0.734656	0.91527	0.866755	0.591164	0.579892	0.533142	SD
One-Way Anova		DF	Sum of Squares	Mean Square	F Value	Prob>F
	Model	6	111.405	18.5675	31.2236	3.35435e-10
	Error	24	14.2719	0.59466
	Total	30	125.677
Fit Statistics	R-Square	Coeff Var	Root MSE	Data Mean
	0.88644	-0.21304	0.77114	-3.61971
Tukey Test		MeanDiff	SEM	q Value	Prob	Alpha	Sig	LCL	UCL
	B A	-3.75475	0.54528	9.73813	7.52064e-06	0.01	1	-5.8916	-1.6179
	C A	-6.83225	0.5173	18.6783	3.99834e-08	0.01	1	-8.85945	-4.80505
	C B	-3.0775	0.5173	8.4134	7.05422e-05	0.01	1	-5.1047	-1.0503
	D A	-2.85625	0.5173	7.80853	0.000200241	0.01	1	-4.88345	-0.82905
	D B	0.8985	0.5173	2.45636	0.59964	0.01	0	-1.1287	2.9257
	D C	3.976	0.48771	11.5291	3.93447e-07	0.01	1	2.06474	5.88726
	E A	-2.54725	0.54528	6.60642	0.00162	0.01	1	-4.6841	-0.4104
	E B	1.2075	0.54528	3.13171	0.32471	0.01	0	-0.92935	3.34435
	E C	4.285	0.5173	11.7145	2.88582e-07	0.01	1	2.2578	6.3122
	E D	0.309	0.5173	0.84476	0.9963	0.01	0	-1.7182	2.3362
	F A	-3.99725	0.54528	10.3671	2.66044e-06	0.01	1	-6.1341	-1.8604
	F B	-0.2425	0.54528	0.62894	0.99929	0.01	0	-2.37935	1.89435
	F C	2.835	0.5173	7.75044	0.000221459	0.01	1	0.8078	4.8622
	F D	-1.141	0.5173	3.11931	0.32904	0.01	0	-3.1682	0.8862
	F E	-1.45	0.54528	3.76065	0.15254	0.01	0	-3.58685	0.68685
	G A	-3.41225	0.5173	9.32855	1.49144e-05	0.01	1	-5.43945	-1.38505
	G B	0.3425	0.5173	0.93634	0.99354	0.01	0	-1.6847	2.3697
	G C	3.42	0.48771	9.91689	5.5911e-06	0.01	1	1.50874	5.33126
	G D	-0.556	0.48771	1.61222	0.90903	0.01	0	-2.46726	1.35526
	G E	-0.865	0.5173	2.36477	0.63966	0.01	0	-2.8922	1.1622
	G F	0.585	0.5173	1.5993	0.9121	0.01	0	-1.4422	2.6122

## Sheet: 3-S1A
WT	WT+ABI1	WT +CIPK23/CBL1	WT +CIPK23/CBL1 +ABI1	WT +PBL27	WT +PBL27 +ABI1
-0.16	-0.33	-4.45	-0.67	-4.57	-3.59
-0.35	-0.82	-5.83	-0.19	-5.53	-4.2
-0.31	-0.19	-4.66	-0.54	-6.04	-7.14
-0.45	-0.21	-5.57	-0.81	-4.92	-6.25
		-5.68	-0.21	-4.81	-4.49
		-6.44	-0.81		-5.11
		-5.52	-0.45
			-0.6
-0.3175	-0.3875	-5.45	-0.535	-5.174	-5.13	mean
0.104253	0.25538	0.6348	0.225167	0.53638	1.22072	SD
One-Way Anova		DF	Sum of Squares	Mean Square	F Value	Prob>F
	Model	5	197.564	39.5127	79.5352	1.11022e-15
	Error	28	13.9103	0.4968
	Total	33	211.474
Fit Statistics	R-Square	Coeff Var	Root MSE	Data Mean
	0.93422	-0.23518	0.70484	-2.99706
Tukey Test		MeanDiff	SEM	q Value	Prob	Alpha	Sig	LCL	UCL
	B A	-0.07	0.4984	0.19863	0.99999	0.01	0	-1.93042	1.79042
	C A	-5.1325	0.44178	16.43	1.82314e-08	0.01	1	-6.78158	-3.48342
	C B	-5.0625	0.44178	16.2059	1.91213e-08	0.01	1	-6.71158	-3.41342
	D A	-0.2175	0.43162	0.71264	0.99561	0.01	0	-1.82867	1.39367
	D B	-0.1475	0.43162	0.48328	0.99931	0.01	0	-1.75867	1.46367
	D C	4.915	0.36479	19.0545	2.06578e-08	0.01	1	3.55331	6.27669
	E A	-4.8565	0.47282	14.5259	2.66234e-08	0.01	1	-6.62145	-3.09155
	E B	-4.7865	0.47282	14.3165	2.70952e-08	0.01	1	-6.55145	-3.02155
	E C	0.276	0.41271	0.94576	0.98399	0.01	0	-1.26457	1.81657
	E D	-4.639	0.40182	16.3271	1.86385e-08	0.01	1	-6.13892	-3.13908
	F A	-4.8125	0.45497	14.959	2.44483e-08	0.01	1	-6.51082	-3.11418
	F B	-4.7425	0.45497	14.7414	2.55046e-08	0.01	1	-6.44082	-3.04418
	F C	0.32	0.39214	1.15406	0.9621	0.01	0	-1.14377	1.78377
	F D	-4.595	0.38066	17.0714	1.57462e-08	0.01	1	-6.01592	-3.17408
	F E	0.044	0.4268	0.1458	1	0.01	0	-1.54917	1.63717

## Sheet: 3-S1B
+none	+BIK1	+PBL27	+CIPK23/CBL1	+OST1
-0.81	-0.45	-0.65	-32.55	-17.98
-0.75	-0.51	-0.44	-24.76	-12.4
-1.25	-1.07	-1.2	-26.14	-30.74
-0.66	-0.85	-0.66	-27.09	-21.19
-0.8675	-0.72	-0.7375	-27.635	-20.5775	mean
0.227198	0.25318	0.281103	2.95613	6.65714	SD
One-Way Anova		DF	Sum of Squares	Mean Square	F Value	Prob>F
	Model	4	2712.54	678.134	47.755	2.3278e-08
	Error	15	213.004	14.2003
	Total	19	2925.54
Fit Statistics	R-Square	Coeff Var	Root MSE	Data Mean
	0.92719	-0.37282	3.76832	-10.1075
Tukey Test		MeanDiff	SEM	q Value	Prob	Alpha	Sig	LCL	UCL
	B A	0.1475	2.66461	0.07828	1	0.01	0	-10.3205	10.6155
	C A	0.13	2.66461	0.069	1	0.01	0	-10.338	10.598
	C B	-0.0175	2.66461	0.00929	1	0.01	0	-10.4855	10.4505
	D A	-26.7675	2.66461	14.2066	3.60974e-07	0.01	1	-37.2355	-16.2995
	D B	-26.915	2.66461	14.2849	3.3316e-07	0.01	1	-37.383	-16.447
	D C	-26.8975	2.66461	14.2756	3.36346e-07	0.01	1	-37.3655	-16.4295
	E A	-19.71	2.66461	10.4609	1.90775e-05	0.01	1	-30.178	-9.24203
	E B	-19.8575	2.66461	10.5392	1.74552e-05	0.01	1	-30.3255	-9.38953
	E C	-19.84	2.66461	10.5299	1.76399e-05	0.01	1	-30.308	-9.37203
	E D	7.0575	2.66461	3.7457	0.11068	0.01	0	-3.41047	17.5255

## Sheet: 3-S1C
+none	+PBL27	+PBL19	+PBL39	+BIK1	+PBL1
-0.14	-4.77	-0.31	-0.12	-0.19	-5.75
-0.41	-3.45	-0.1998	-0.201	-0.42	-6.11
-0.73	-3.76	-0.22	-0.13	-1.03	-6.02
-0.49	-4.13	-0.15	-0.196	-0.3	-5.45
-0.15	-5.66	-0.36			-9.77
					-9.81
					-6.34
-0.384	-4.354	-0.24796	-0.16175	-0.485	-7.03571	mean
0.221775	0.787264	0.0762879	0.036962	0.325	1.76122	SD
One-Way Anova		DF	Sum of Squares	Mean Square	F Value	Prob>F
	Model	5	246.948	49.3895	46.4568	1.4404e-11
	Error	24	25.5151	1.06313
	Total	29	272.463
Fit Statistics	R-Square	Coeff Var	Root MSE	Data Mean
	0.90635	-0.40294	1.03108	-2.55889
Tukey Test		MeanDiff	SEM	q Value	Prob	Alpha	Sig	LCL	UCL
	B A	-3.97	0.65211	8.60959	3.68424e-05	0.01	1	-6.44778	-1.49222
	C A	0.13604	0.65211	0.29502	0.99994	0.01	0	-2.34174	2.61382
	C B	4.10604	0.65211	8.90462	2.22584e-05	0.01	1	1.62826	6.58382
	D A	0.22225	0.69167	0.45442	0.99948	0.01	0	-2.40583	2.85033
	D B	4.19225	0.69167	8.57162	3.93207e-05	0.01	1	1.56417	6.82033
	D C	0.08621	0.69167	0.17627	0.99999	0.01	0	-2.54187	2.71429
	E A	-0.101	0.69167	0.20651	0.99999	0.01	0	-2.72908	2.52708
	E B	3.869	0.69167	7.9107	0.000123095	0.01	1	1.24092	6.49708
	E C	-0.23704	0.69167	0.48466	0.99929	0.01	0	-2.86512	2.39104
	E D	-0.32325	0.72908	0.62701	0.99756	0.01	0	-3.09349	2.44699
	F A	-6.65171	0.60374	15.5811	0	0.01	1	-8.94569	-4.35774
	F B	-2.68171	0.60374	6.28171	0.00211	0.01	1	-4.97569	-0.38774
	F C	-6.78775	0.60374	15.8998	0	0.01	1	-9.08173	-4.49378
	F D	-6.87396	0.64626	15.0422	0	0.01	1	-9.32952	-4.41841
	F E	-6.55071	0.64626	14.3349	0	0.01	1	-9.00627	-4.09516

## Sheet: 3-S1D
+none	+PBL27	+MAPKKK5	+PBL27 +MAPKKK5
-1.42	-5.66	-1.21	-4.39
-0.35	-8.82	-0.48	-4.603
-0.72	-5.996	-0.97	-3.54
-1.57	-5.47	-0.91	-6.06
-1.34	-8.43	-1.07	-7.11
	-4.87		-5.21
-1.08	-6.541	-0.928	-5.15217	mean
0.466004	1.51518	0.245959	1.16492	SD
One-Way Anova		DF	Sum of Squares	Mean Square	F Value	Prob>F
	Model	3	133.757	44.5856	34.4363	1.14369e-07
	Error	18	23.3051	1.29473
	Total	21	157.062
Fit Statistics	R-Square	Coeff Var	Root MSE	Data Mean
	0.85162	-0.31214	1.13786	-3.64541
Tukey Test		MeanDiff	SEM	q Value	Prob	Alpha	Sig	LCL	UCL
	B A	-5.461	0.68901	11.2089	1.53622e-06	0.01	1	-7.94299	-2.97901
	C A	0.152	0.71965	0.2987	0.99654	0.01	0	-2.44035	2.74435
	C B	5.613	0.68901	11.5209	1.03548e-06	0.01	1	3.13101	8.09499
	D A	-4.07217	0.68901	8.35826	7.36981e-05	0.01	1	-6.55416	-1.59018
	D B	1.38883	0.65694	2.98976	0.18629	0.01	0	-0.97765	3.75532
	D C	-4.22417	0.68901	8.67024	4.71109e-05	0.01	1	-6.70616	-1.74218

[truncated: 9 more sheets: 3-S1E, 3-S2A, 3-S2B, 3-S2C, 3-S2D, 3-S2E, 3-S3A, 3-S3B, 3-S3C]
