# Supplementary material for: Anion channel SLAH3 is a regulatory target of chitin receptor-associated kinase PBL27 in microbial stomatal closure
Source: eLife journal article supplement (doi:10.7554/elife.44474), 2019-09-16
Supplement: supp [file elife-44474-supp-v1.zip › elife_poa_e44474_Figure_5_source_data_1.xlsx]

## Sheet: 5A
			slah3-1	slah3-1	slah3-1	slah3-1
plant	Col-0	slah3-1	SLAH3 WT	S127A	S189A	S601A
1	4.3	4.39	5.01	6.01	6.75	8.05
	4.18	4.15	5.55	5.51	5.99	5.98
	3.52	6.31	5.05	4.82	3.15	6.39
	5.52	5.1	5.28	4.82		6.25
2	3.88	4.71	6.77	8.54	6.38	3.83
	3.11	5.65	6.37	7.2	6.64	4.16
	3.99	5.37	4.22	1.85	1.81	3.76
	4.39	4.26	5.26		2.21	4.03
3	3.35	4.46	2.74	8.34	6.74	6.08
	2.67	4.55	1.68	4.75	5.13	5.1
	2.67	3.57	2.87	6.43	4.7	4.91
	0.69	4.47	1.08	5.73	4.98	3.04
4	0.94		6.15	9.52	6.06	3.48
	1.42		4.72	4.97	4.18	4.67
	4		3.84	6.12	5.82	3.7
	2.96		3.05		5.52	3.77
5	2.98	4.12	6.48	4.58	7.89	4.99
	2.81	5.08	4.64	4.51	3.73	2.14
	5.93	3.97	6.21	4.71	5.36	3.32
		5.28	4.45	5.2	3.08	1.35
6	4.42	4.14		7.89	6.33	5.57
	3.2	4.58		2.42	5.34	5.26
	4.08	1.29		3.32	6.73	1.31
	3.15	4.17		2.52	4.15
7		7.22	4.38	6.22	6.43	5.64
		6.31	2.96	6.91	6.07	5.75
		8.34	2.72	5.95	7.04	5.18
			0.97	5.79	7.75
8	3.31	7.25	2.14	7.37	7.92	4.36
	3.68	7.27	4.41	6.78	8.26	4
	1.38	6.17	4.48	7.47	6.59	2.65
	2.73	5.56	3.42	5.09	7.34	3.39
9	6.05	5.42	6.16	6.61	5.92	4.79
	3.79	5.77	6.89	6.6	5.56	3.62
	4.61	5.88	2.5	7.34	5.19	1.84
		4.43	5.26	4.81	5.48	1.03
10	5.81	6.29	bad plant	3.51	bad plant	bad plant
	5.46	5.96		4.97
	4.95	6.49		4.56
	6.07	7.41		1.91
Mean	3.70588	5.29686	4.30344	5.56974	5.66343	4.21735
Standard dev	1.40016	1.36357	1.66294	1.80459	1.56588	1.60198
	1.00152e-05	0.0100195	0.120619			0.00371963

## Sheet: 5E rep1
		Col-0								pbl27-1
		7.907	6.889	9.225			8.559	7.53		4.137	8.185			3.184	3.796	3.648	4.12	3.184	3.346		4.092
		3.901	3.201	9.225		7.504	2.462	6.206	5.038	2.205	6.817	10.452		7.159	3.427	8.201	3.089	5.486	3.698		3.27
		6.071	6.386	1.949	4.968	7.743	5.251	7.081	7.768	3.163	6.599	5.368	3.27	7.003	3.641	4.041	8.201	3.832	4.503		3.648				Col-0	pbl27-1
		8.517	4.105	4.787	4.59	4.643	7.717	4.833	6.292	8.063	7.283	7.497	3.641	6.908	3.533	2.785	4.07	4.889	8.343	4.115	4.579			average	6.03286	5.25301
		4.032	2.821	9.303	7.026	8.083	5.844	2.281	7.002	3.648	7.902	6.967	6.723	8.199	5.078	6.245	5.212	3.862	3.454	7.482	5.882			SEM	0.273971	0.363405
	average diameter per plant	6.0856	4.6804	6.8978	5.528	6.99325	5.9666	5.5862	6.525	4.2432	7.3572	7.571	4.54467	6.4906	3.895	4.984	4.9384	4.2506	4.6688	5.7985	4.2942
	average of all plants	6.03286								5.25301
	SEM	0.273971								0.363405
	T-test	0.136547
		Col-0								pbl27-1
		7.907	6.889	9.225	0	0	8.559	7.53	0	4.137	8.185	0	0	3.184	3.796	3.648	4.12	3.184	3.346	0	4.092
		3.901	3.201	9.225	0	7.504	2.462	6.206	5.038	2.205	6.817	10.452	0	7.159	3.427	8.201	3.089	5.486	3.698	0	3.27
		6.071	6.386	1.949	4.968	7.743	5.251	7.081	7.768	3.163	6.599	5.368	3.27	7.003	3.641	4.041	8.201	3.832	4.503	0	3.648				Col-0	pbl27-1
		8.517	4.105	4.787	4.59	4.643	7.717	4.833	6.292	8.063	7.283	7.497	3.641	6.908	3.533	2.785	4.07	4.889	8.343	4.115	4.579			average	5.4185	5.0865
		4.032	2.821	9.303	7.026	8.083	5.844	2.281	7.002	3.648	7.902	6.967	6.723	8.199	5.078	6.245	5.212	3.862	3.454	7.482	5.882			SEM	0.377828	0.417676
	average diameter per plant	6.0856	4.6804	6.8978	3.3168	5.5946	5.9666	5.5862	5.22	4.2432	7.3572	6.0568	2.7268	6.4906	3.895	4.984	4.9384	4.2506	4.6688	2.3194	4.2942
	average of all plants	5.4185								5.0865
	SEM	0.377828								0.417676
	T-test	0.236947

## Sheet: 5E rep2
		Col-0								pbl27-1
		2.772	2.266	4.247	2.32	3.234	2.607	2.602	2.952	4.266	4.012	2.947	2.691	2.537
		3.2	3.576	2.133	7.525	3.04	3.418	2.98	2.866	4.012	3.769	2.837	2.425	3.169						Col-0	pbl27-1
		2.832	3.143	3.306	4.266	2.691	3.798	4.164	2.966	3.541	2.591	3.234	3.234	3.071					average	3.40651	3.16018
		3.699	2.837		3.434	3.234	3.434	3.319		4.114	3.306	1.536	3.514	2.846					SEM	0.159158	0.241814
		4.114	3.331		2.757	6.244	6.69	1.95				2.712	2.332
	average diameter per plant	3.3234	3.0306	3.22867	4.0604	3.6886	3.9894	3.003	2.928	3.98325	3.4195	2.6532	2.8392	2.90575
	average of all plants	3.40651								3.16018
	SEM	0.159158								0.241814
	T-test	0.392099
		Col-0								pbl27-1
		2.772	2.266	4.247	2.32	3.234	2.607	2.602	2.952	4.266	4.012	2.947	2.691	2.537
		3.2	3.576	2.133	7.525	3.04	3.418	2.98	2.866	4.012	3.769	2.837	2.425	3.169
		2.832	3.143	3.306	4.266	2.691	3.798	4.164	2.966	3.541	2.591	3.234	3.234	3.071						Col-0	pbl27-1
		3.699	2.837	0	3.434	3.234	3.434	3.319	0	4.114	3.306	1.536	3.514	2.846					average	3.09868	2.74784
		4.114	3.331	0	2.757	6.244	6.69	1.95	0	0	0	2.712	2.332	0					SEM	0.307067	0.13948
	average diameter per plant	3.3234	3.0306	1.9372	4.0604	3.6886	3.9894	3.003	1.7568	3.1866	2.7356	2.6532	2.8392	2.3246
	average of all plants	3.09868								2.74784
	SEM	0.307067								0.13948
	T-test	0.409613
