# Supplementary material for: Anion channel SLAH3 is a regulatory target of chitin receptor-associated kinase PBL27 in microbial stomatal closure
Source: eLife journal article supplement (doi:10.7554/elife.44474), 2019-09-16
Supplement: supp [file elife-44474-supp-v1.zip › elife_poa_e44474_Figure_5_source_data_2.xlsx]

## Sheet: 5C
raw data		Col-0			slah3-1			SLAH3
water	0.19245	0.1764	0.19515	0.10155	0.10005	0.12675	0.20385	0.20685	0.09975
1 µM COS	0.28755	0.39975	0.5388	0.28905	0.3369	0.1866	0.3864	0.37425	0.11625
10 µM COS	0.75705	0.68955	1.15095	0.3741	0.46845	0.3972	0.639	0.6027	0.4578
45 µg/ml Pen	0.56565	0.8007	0.8877	0.3576	0.5841	0.6132	0.4854	0.70485	0.711
100 nM flg22	1.1787	1.27125	1.34145	1.04415	0.97935	1.2213	0.92805	0.9984	0.9123
3 µM CT	0.3618	0.29625	0.23625									mean	Col-0	slah3-1	SLAH3	stabw	Col-0	slah3-1	SLAH3
												control	1	1.00413	1.00088		0.0440222	0.112369	0.292914
												1 µM COS	2.17394	2.48486	2.923		0.546635	0.575181	1.24585
												45 µg/ml pen	3.99654	4.75505	6.3375		0.723556	1.04818	1.04929
mean/stabw	Col-0		in %	slah3-1			SLAH3
water	0.188	0.00827617	4.40222	0.10945	0.0122483	11.1907	0.17015	0.0497954	29.2656
1 µM COS	0.4087	0.102767	25.145	0.27085	0.0626948	23.1474	0.2923	0.124585	42.6223
10 µM COS	0.86585	0.203471		0.41325	0.0401554		0.5665	0.0782781
45 µg/ml Pen	0.75135	0.136028	18.1045	0.5183	0.114251	22.0435	0.63375	0.104929	16.5569
100 nM flg22	1.2638	0.0666509		1.0816	0.102264		0.94625	0.037432
3 µM CT	0.2981	0.0512723
fold change	Col-0			slah3-1			SLAH3
water	1	0.0440222		1.00413	0.112369		1.00088	0.292914
1 µM COS	2.17394	0.546635		2.48486	0.575181		2.923	1.24585
10 µM COS	4.60559			3.79128			5.665
45 µg/ml Pen	3.99654	0.723556		4.75505	1.04818		6.3375	1.04929
100 nM flg22	6.72234			9.92294			9.4625
3 µM CT	1.58564
