# Supplementary material for: Anion channel SLAH3 is a regulatory target of chitin receptor-associated kinase PBL27 in microbial stomatal closure
Source: eLife journal article supplement (doi:10.7554/elife.44474), 2019-09-16
Supplement: supp [file elife-44474-supp-v1.zip › elife_poa_e44474_Figure_5_source_data_3.xlsx]

## Sheet: 5B
1 µM COS	115039	204770	189468	401903	227641		227764	106098
Col-0	3.7.-1	3.7.-4	3.7.-5	3.7.-6	10.7.
	11579	57320	155509	197240	95347
	163358	308821	167588	481464	336564
	184415	172326	165242	212204	282702
	80572	183820	251564	424046	268230						mean	Col-0	slah3-1	SLAH3	stabw	Col-0	slah3-1	SLAH3
	135272	223996	318663	668344	171338						control	16183.7	15798.2	15798.2		4871.91	2223.32	2223.32
		282337	78239	428122	91987						1 µM COS	227764	215701	222108		106098	109846	45516.2
					460068
					114890
	110427	248207	173347	155568	390958		215701	109846
slah3-1	3.7.-1	3.7.-4	3.7.-5	3.7.-6	10.7.
	54949	148777	102883	124372	460689
	191357	151019	132631	84602	322153
	141849	346607	182540	169158	281280
	81182		294127	238814
	116742	515339	230887	160892	435322
	76485	79295	97014		575405
					326288
					335570
	171374	257221	181393	275130	225419		222108	45516.2
SLAH3	3.7.-2	3.7.-4	3.7.-5	3.7.-6	10.7.
	340221	402800	86457	207719	207892
	181538	194212		211975	365452
	10638	267512	405242	416268	103740
	199025	200155	161750	244196	276279
	83888	376618	172052	339857	119602
	212935	102029	81464	230767
					149771
					355199
					136753
					457295
water	13566	21804.8			13180.1		16183.7	4871.91
Col-0	3.7.-1	3.7.-3
	9076	22867			9449
	11022	9522			8228
	12155	29104			6034
	13113	26480			17497
	21338	32214			26712
	14692	10642			13654
					11260
					12607
	13635.8	18077.8			15681		15798.2	2223.32
slah3-1	3.7.-1	3.7.-4
	14928	20582			8568
	7013	7127			4837
	16010	21763			15565
	19745	12702			9671
	15152	21477			38452
	8967	24816			14069
					7203
					27083
	16203.5	22735.2			20881.2		19940	3366.03
SLAH3	3.7.-2	3.7.-4
	24478	3465			11834
	8680	31482			23375
	11333	23296			5149
	5886	55259			13024
	7588	14842			15778
	39256	8067			39253
					15299
					43338

## Sheet: 5D
		Col-0																							pbl27-1
	mock						chitin																		mock									chitin
	8	14	12	22	12	10	16	10	20	16	20	38	10	22	28	6	2	14	14	12	10	14	24	20	12	0	4	20	22	4	6	30	8	2	6	16	26	48	4	26	36	40	64	26	40	142	46	20	44
	8	14	4	4	6	6	8	14	34	6	12	76	36	22	46	16	6	24	12	4	74	6	26	12	2	12	8	8	18	12	2	28	4	30	24	80	32	156	46	36	124	96	102	24	120	236	104	22	94
	4	4	6	4	2	10	28	16	60	14	52	160	34	14	110	8	18	32	24	44	136	32	22	8	6	10	14	10	8	8	8	10	4	6	28	130	74	264	114	120	316	220	164	26	222	342	188	80	140
	2	8	0	6	12	8	52	40	154	14	78	258	50	32	230	6	34	50	4	92	200	76	26	18	4	4	12	10	10	6	8	16	0	38	40	226	210	388	230	200	482	332	240	102	418	344	272	130	340
	6	0	6	8	8	14	98	62	198	26	94	366	66	32	252	38	28	82	16	160	302	96	70	32	10	14	2	6	14	2	10	10	10	82	62	310	340	556	276	292	526	320	288	136	460	464	228	208	420
	4	10	8	8	6	12	104	88	266	42	174	428	94	74	270	26	70	98	44	178	288	82	58	36	2	4	4	2	10	10	14	4	12	82	80	326	296	556	356	344	618	404	280	148	508	360	282	270	388
	6	2	20	0	0	6	124	90	320	40	146	450	128	62	294	66	94	124	50	176	348	156	114	48	2	0	8	6	8	16	10	6	8	140	128	350	324	488	350	418	590	346	248	196	476	354	272	308	406
	0	6	8	12	10	6	156	126	272	22	244	464	128	72	266	22	114	130	60	216	326	130	80	66	4	8	8	6	4	6	8	-1	6	170	150	290	368	446	260	362	518	276	152	110	390	274	282	274	346
	10	8	10	6	14	6	176	130	314	64	190	488	170	102	264	48	108	214	76	192	262	190	96	98	4	2	6	6	6	6	8	4	6	182	122	314	318	480	270	308	382	264	162	124	362	248	262	240	310
	8	10	0	4	14	12	166	146	348	82	280	488	154	82	262	52	120	194	90	228	288	152	98	92	8	8	4	2	6	2	10	2	4	146	138	212	288	340	222	272	386	202	148	102	316	180	224	170	234
	18	4	8	2	8	2	200	162	368	82	256	448	154	124	302	82	168	206	76	230	250	190	106	116	10	2	8	4	10	2	10	10	10	158	154	232	284	380	164	298	398	166	170	72	214	142	210	194	230
	4	-1	4	4	6	2	198	146	406	68	280	480	154	122	374	66	232	158	84	206	278	172	88	104	6	2	0	10	2	-1	14	16	10	174	120	226	284	298	168	270	336	178	200	64	256	148	176	184	184
	6	2	-1	2	0	2	192	184	370	100	316	508	196	128	372	102	222	234	108	290	312	206	90	114	8	16	0	2	2	10	8	8	-1	214	108	274	292	368	164	196	320	184	152	64	250	98	178	136	162
	4	4	8	10	16	4	210	178	512	110	388	530	180	100	354	92	236	270	112	306	304	204	98	116	6	30	6	8	10	12	16	12	6	158	106	234	212	358	188	180	350	132	130	96	236	46	208	166	196
	2	6	16	4	8	2	204	210	442	86	418	426	184	144	376	106	252	250	110	310	320	182	98	138	6	14	6	8	4	6	0	16	10	192	124	226	220	338	182	184	354	184	180	68	300	62	162	142	202
	4	8	16	6	6	10	246	194	560	108	438	514	196	140	396	98	284	216	110	262	368	166	102	158	6	4	2	4	16	4	14	12	6	184	120	222	234	316	202	184	354	178	178	82	220	84	166	146	180
	8	10	4	8	4	8	252	266	520	108	532	490	188	132	430	178	242	274	102	334	380	200	90	146	2	12	8	10	8	2	8	18	2	146	122	236	210	310	184	158	380	202	214	84	188	38	148	116	182
	0	2	6	4	2	8	174	212	406	112	480	446	180	162	462	122	298	220	92	258	338	266	88	122	6	8	12	2	6	16	8	2	8	226	146	248	224	320	220	178	334	180	154	96	280	44	166	146	206
	20	4	8	8	8	4	210	242	524	116	538	498	228	132	468	122	274	276	90	326	348	228	84	156	2	10	14	4	6	4	0	2	8	164	136	220	266	362	208	206	376	190	120	64	236	42	160	148	118
	8	2	8	6	4	8	192	198	508	128	538	532	158	124	440	142	288	222	86	288	338	210	64	158	8	12	0	4	6	2	6	-1	0	176	112	284	228	312	214	142	414	216	176	60	234	34	136	92	176
	16	4	10	10	6	6	170	186	428	118	528	438	202	120	374	144	256	270	110	302	344	210	72	178	2	2	8	4	4	2	4	6	12	210	106	240	170	330	174	148	388	188	140	60	254	44	144	100	136
	6	6	2	22	18	2	154	202	578	100	488	484	132	120	384	158	252	226	70	290	390	166	76	174	2	2	0	14	8	10	0	0	6	148	148	270	196	352	186	144	350	174	92	74	176	24	146	100	126
	8	14	8	2	12	2	158	166	398	150	542	422	162	114	386	142	266	246	104	274	276	186	52	182	8	8	2	0	2	6	8	8	0	162	114	224	164	320	192	156	374	138	118	46	200	20	132	104	144
	2	6	8	4	0	16	174	182	456	94	486	464	162	132	312	110	232	236	74	312	256	132	34	148	6	10	8	14	6	10	4	6	8	120	126	218	230	298	206	124	326	162	126	60	200	14	148	120	122
	4	0	10	4	6	-1	140	160	422	78	338	408	114	132	258	110	218	262	106	244	266	124	74	166	-1	4	8	12	4	0	0	8	4	140	130	224	186	314	152	94	318	128	88	50	196	16	134	72	84
	14	16	18	12	0	6	118	132	404	84	420	358	114	110	268	134	226	204	120	296	230	162	76	116	4	8	4	8	-1	6	4	6	2	124	122	198	198	274	158	84	248	136	92	52	138	6	98	66	70
	4	6	4	8	8	14	122	132	396	80	330	362	110	74	208	150	200	142	92	232	244	140	52	102	6	12	2	0	8	6	10	2	0	106	112	188	164	234	136	84	272	112	76	40	102	12	74	54	60
	18	6	14	8	2	12	128	118	322	72	358	362	102	90	218	132	166	156	76	248	180	108	56	96	14	10	0	2	0	8	8	4	4	114	98	170	182	254	116	86	186	134	78	36	104	16	60	64	68
	4	-1	10	4	8	4	94	78	312	76	334	332	90	68	228	94	146	118	52	222	194	128	38	94	6	6	2	6	18	2	4	8	0	92	66	146	162	212	130	90	184	106	70	40	112	6	56	48	56
	0	4	16	4	-1	4	110	114	264	80	302	286	78	86	148	98	132	142	42	208	160	116	40	96	2	4	6	4	6	10	0	14	6	70	84	152	134	188	104	74	152	96	26	36	110	10	52	36	66
	8	8	4	12	2	4	102	112	208	46	268	288	60	52	124	92	180	140	66	158	150	84	30	88	6	0	0	2	6	2	2	8	10	70	66	130	136	178	88	64	184	104	52	36	94	8	50	50	44
	2	2	2	4	4	14	104	86	214	66	224	274	50	54	120	68	136	126	56	166	150	66	20	72	8	6	6	10	4	10	4	2	4	92	74	118	160	216	102	82	164	82	42	24	66	8	72	42	40
	6	2	4	4	4	4	72	90	182	54	188	228	36	44	116	64	110	132	40	136	124	74	40	70	2	4	6	4	0	8	8	6	8	64	80	78	104	136	114	46	190	60	44	18	88	24	50	40	44
	4	18	8	10	4	6	72	90	182	44	194	200	34	42	76	38	88	108	36	122	118	74	24	64	0	14	-1	12	6	16	2	6	2	50	46	82	126	146	80	46	138	70	58	18	66	4	36	32	26
	10	4	0	8	6	8	74	40	186	16	172	218	36	48	96	50	92	72	26	120	100	44	22	94	4	12	-1	8	8	2	6	6	6	58	64	72	92	154	102	22	122	60	36	14	68	6	22	24	20
	6	2	4	-1	2	6	60	52	136	48	156	194	30	56	86	56	100	84	40	100	72	52	22	78	4	6	0	10	4	0	14	6	4	26	38	74	72	100	78	44	104	62	50	10	42	8	30	10	40
	2	10	10	2	4	4	56	26	156	24	134	190	22	32	70	44	90	82	34	78	80	48	20	56	14	2	12	4	8	4	6	2	4	38	44	70	84	96	74	54	112	42	26	8	48	4	30	10	22
	2	16	6	0	6	2	52	50	118	32	118	162	32	16	42	46	68	72	28	72	80	52	4	42	4	4	18	8	4	6	2	6	8	50	22	48	60	90	56	32	98	34	14	8	48	2	24	12	36
	-1	-1	6	2	6	12	46	34	96	24	118	112	16	18	54	36	42	50	22	60	48	30	10	26	16	2	4	2	14	10	2	8	16	30	34	66	68	80	40	26	82	30	14	8	52	10	44	20	14
	10	8	6	2	0	12	38	20	122	16	128	118	12	22	44	50	32	36	22	74	58	26	12	12	0	10	6	2	8	16	6	6	8	26	34	48	68	60	30	24	60	30	12	10	28	0	26	26	20
	6	6	4	4	4	12	22	20	92	32	86	130	22	30	32	38	50	44	0	80	54	14	8	36	10	10	2	2	32	8	22	2	2	32	26	44	40	72	42	34	52	40	12	2	46	6	36	10	8
	0	0	6	2	6	4	38	42	58	4	76	82	14	12	40	44	32	40	12	50	34	22	10	28	6	4	4	0	22	14	12	10	4	20	22	28	30	60	32	38	50	38	20	6	20	4	10	20	10
	12	4	12	6	4	8	26	20	58	14	86	90	20	26	28	40	22	44	4	42	36	12	18	24	10	10	-1	2	16	10	10	2	16	16	16	52	36	60	28	14	66	20	10	6	36	2	24	8	20
	6	14	2	2	6	16	22	22	64	12	82	74	4	12	18	34	38	30	-1	30	16	14	10	36	12	0	2	4	16	8	2	6	4	12	12	54	40	20	32	10	52	26	18	8	16	8	20	0	2
	10	6	12	10	6	6	24	18	34	18	56	38	18	10	20	32	20	36	16	38	36	16	8	20	6	0	6	2	14	2	4	16	4	24	20	34	34	54	10	8	48	18	22	2	22	12	16	10	18
	12	14	0	16	6	20	10	12	66	20	52	68	6	20	30	16	34	22	8	26	20	22	16	18	2	4	2	4	16	4	0	8	8	20	26	32	58	30	26	14	34	14	8	8	6	16	20	8	12
	2	0	14	2	10	-1	14	12	46	16	62	44	18	2	22	20	36	20	14	14	30	10	4	12	4	4	10	6	32	8	0	8	6	6	16	20	32	22	22	20	34	22	24	14	20	4	10	14	14
	8	8	10	4	8	8	22	10	70	10	66	64	8	14	28	18	34	16	10	34	28	8	8	20	4	4	8	4	12	2	2	12	8	6	20	22	50	46	14	16	34	32	6	2	26	8	28	14	12
	6	4	12	10	6	12	6	14	56	20	40	54	8	12	22	16	28	14	14	32	20	8	8	18	8	4	6	6	14	8	4	6	10	12	10	22	24	30	16	14	38	24	2	8	2	12	14	8	10
	14	8	6	6	6	4	24	4	56	8	54	60	6	14	26	20	22	12	12	16	30	16	16	12	16	6	4	16	22	10	4	20	10	12	12	20	30	26	12	12	28	14	14	4	10	4	30	10	6
	2	14	-1	6	2	0	6	6	48	12	32	44	10	2	30	20	18	14	6	28	18	10	16	16	8	6	8	0	18	6	2	12	12	4	14	18	32	42	30	6	28	14	20	4	10	4	10	6	12
	8	10	10	4	2	2	22	12	42	4	38	46	12	8	40	26	26	14	10	16	20	12	12	8	12	8	24	6	16	14	8	6	2	4	16	18	22	48	16	12	48	18	14	2	32	12	20	2	14
	8	12	12	14	2	-1	24	8	38	4	38	34	8	8	14	26	18	30	0	20	28	10	14	12	8	16	4	0	16	4	10	14	6	10	16	20	20	24	14	6	24	4	18	6	0	0	20	18	12
	6	24	4	12	8	4	16	8	24	14	54	68	2	8	30	26	14	14	18	24	6	10	4	26	10	10	10	2	12	2	18	0	2	6	10	20	40	38	30	12	30	20	6	14	2	12	22	4	4
	20	0	10	10	16	16	26	12	40	8	26	30	6	10	16	26	32	8	10	18	20	16	0	8	12	8	6	2	24	8	4	6	4	10	8	36	26	26	20	-1	34	18	4	4	18	4	24	8	20
	6	8	10	6	0	2	20	8	44	2	34	44	8	14	24	10	14	10	18	18	20	10	6	16	8	8	2	24	8	0	2	8	6	2	16	20	20	32	20	16	28	16	10	2	22	10	26	4	14
	12	0	2	4	2	10	20	2	28	14	38	50	16	16	28	10	8	10	6	24	44	12	10	2	2	8	4	8	18	6	0	6	4	4	10	26	18	38	6	10	16	16	16	8	14	6	16	2	22
	10	6	4	16	2	2	20	16	40	4	72	34	12	8	20	12	18	20	12	24	22	6	0	10	8	4	2	0	8	12	0	2	6	10	6	20	24	24	8	10	40	28	16	12	20	12	10	16	22
	2	4	2	12	2	12	16	6	52	10	32	48	12	12	28	30	16	12	12	22	20	16	6	10	-1	2	6	8	12	4	2	12	0	12	4	8	40	28	18	14	32	40	10	14	28	2	18	6	20
	14	2	2	12	2	10	12	10	60	6	40	62	8	10	30	8	20	26	4	26	18	8	6	8	2	10	24	20	14	12	6	4	8	0	16	22	22	46	6	10	44	24	10	2	14	10	28	16	20
sum	419	391	434	407	343	423	5440	5046	13198	2878	12364	15152	4500	3500	10134	3686	6622	6628	2761	8408	9510	5232	2476	4052	368	424	349	374	635	405	374	482	355	4682	3930	8008	8124	11882	6742	6173	12406	6704	5036	2520	8282	4072	5700	4406	6068
average of the sum	402.833						6754.83																		418.444									6491.78
SEM	13.3876						910.943																		30.3887									748.195
	Col-0		pbl27-1
	mock	chitin	mock	chitin
	419	5440	368	4682
	391	5046	424	3930
	434	13198	349	8008
	407	2878	374	8124
	343	12364	635	11882
	423	15152	405	6742
		4500	374	6173
		3500	482	12406
		10134	355	6704
		3686		5036
		6622		2520
		6628		8282
		2761		4072
		8408		5700
		9510		4406
		5232		6068
		2476		12354
		4052		1400
				4359
				10268
				6974
				14040
				8306
				1106
				3042
				7316
				1378
average of the sum	402.833	6754.83	418.444	6491.78
SEM	13.3876	910.943	30.3887	673.567
t-test (chitin treatment)		0.813829
t-test (mock to chitin treatment)	0.000654968		1.08132e-05
		average of the sum			SEM
		Col-0	pbl27-1		Col-0	pbl27-1
	mock	402.833	418.444		13.3876	30.3887
	chitin	6754.83	6491.78		910.943	673.567
[truncated: 11 more columns]
